# Supplementary material for: LDAPred: A Method Based on Information Flow Propagation and a Convolutional Neural Network for the Prediction of Disease-Associated lncRNAs
Source: Int J Mol Sci. 2019 Sep 10;20(18):4458. doi: 10.3390/ijms20184458 (PMC6771133; doi:10.3390/ijms20184458)
Supplement: Supplementary file 1 [file ijms-20-04458-s001.zip › ST1_candidates.xls]

## Sheet: Hey, Dude
Disease name	Rank	Candidate lncRNA name	Association score
disease of metabolism	1	MEG3	0.966561
disease of metabolism	2	MALAT1	0.886576
disease of metabolism	3	CDKN2B-AS1	0.782554
disease of metabolism	4	MCHR2-AS1	0.711851
disease of metabolism	5	IGF2-AS	0.703759
disease of metabolism	6	LINC00271	0.703165
disease of metabolism	7	SNHG11	0.701978
disease of metabolism	8	GNAS-AS1	0.700363
disease of metabolism	9	H19	0.700121
disease of metabolism	10	PCA3	0.700002
disease of metabolism	11	PVT1	0.7
disease of metabolism	12	OIP5-AS1	0.699992
disease of metabolism	13	LINC00477	0.699961
disease of metabolism	14	PARD6G-AS1	0.699831
disease of metabolism	15	GATA3-AS1	0.699497
disease of metabolism	16	LINC00319	0.699421
disease of metabolism	17	CECR7	0.699191
disease of metabolism	18	MEG8	0.698473
disease of metabolism	19	GABPB1-AS1	0.698341
disease of metabolism	20	LINC00315	0.698082
disease of metabolism	21	LINC00575	0.696983
disease of metabolism	22	LINC01184	0.696908
disease of metabolism	23	TSIX	0.696623
disease of metabolism	24	GHRLOS	0.694015
disease of metabolism	25	MIR22HG	0.688355
disease of metabolism	26	LINC00479	0.654472
disease of metabolism	27	HELLPAR	0.644527
disease of metabolism	28	LINC01235	0.60848
disease of metabolism	29	PWAR5	0.575695
disease of metabolism	30	VLDLR-AS1	0.548082
disease of metabolism	31	DISC1FP1	0.524549
disease of metabolism	32	CARMN	0.519724
disease of metabolism	33	PWRN1	0.514658
disease of metabolism	34	B3GALT5-AS1	0.435315
disease of metabolism	35	FALEC	0.385867
disease of metabolism	36	XACT	0.33368
disease of metabolism	37	PARTICL	0.300014
disease of metabolism	38	MIR4435-2HG	0.276029
disease of metabolism	39	MIR181A1HG	0.220132
disease of metabolism	40	PEG3-AS1	0.196169
disease of metabolism	41	COPG2IT1	0.123307
disease of metabolism	42	PCAT4	0.105489
disease of metabolism	43	ADORA2A-AS1	0.0664433
disease of metabolism	44	COL18A1-AS1	0.0574334
disease of metabolism	45	LINC00293	0.0558047
disease of metabolism	46	TTTY4	0.0548174
disease of metabolism	47	APTR	0.0494377
disease of metabolism	48	OLMALINC	0.0360421
disease of metabolism	49	HAS2-AS1	0.0200327
disease of metabolism	50	RAD51-AS1	0.0186369
carbohydrate metabolism disease	1	LINC00271	0.975345
carbohydrate metabolism disease	2	KCNQ1OT1	0.940723
carbohydrate metabolism disease	3	MEG3	0.71272
carbohydrate metabolism disease	4	IGF2-AS	0.703511
carbohydrate metabolism disease	5	MALAT1	0.700981
carbohydrate metabolism disease	6	HYMAI	0.700946
carbohydrate metabolism disease	7	CDKN2B-AS1	0.70001
carbohydrate metabolism disease	8	GATA3-AS1	0.700009
carbohydrate metabolism disease	9	PARD6G-AS1	0.698555
carbohydrate metabolism disease	10	LINC00477	0.69846
carbohydrate metabolism disease	11	LINC00319	0.682674
carbohydrate metabolism disease	12	CECR7	0.680236
carbohydrate metabolism disease	13	GABPB1-AS1	0.675358
carbohydrate metabolism disease	14	MEG8	0.654405
carbohydrate metabolism disease	15	GHRLOS	0.60333
carbohydrate metabolism disease	16	MIR22HG	0.406693
carbohydrate metabolism disease	17	PWRN1	0.360007
carbohydrate metabolism disease	18	HELLPAR	0.250724
carbohydrate metabolism disease	19	LINC00315	0.153694
carbohydrate metabolism disease	20	LINC00575	0.140678
carbohydrate metabolism disease	21	LINC01235	0.086143
carbohydrate metabolism disease	22	VLDLR-AS1	0.0859048
carbohydrate metabolism disease	23	TSIX	0.068823
carbohydrate metabolism disease	24	LINC00479	0.0495591
carbohydrate metabolism disease	25	PWAR5	0.0433967
carbohydrate metabolism disease	26	DISC1FP1	0.0391117
carbohydrate metabolism disease	27	CARMN	0.00951334
carbohydrate metabolism disease	28	LINC01184	0.00895054
carbohydrate metabolism disease	29	TTTY4	0.00840919
carbohydrate metabolism disease	30	B3GALT5-AS1	0.00497162
carbohydrate metabolism disease	31	FMR1-AS1	0.00440001
carbohydrate metabolism disease	32	XACT	0.00381476
carbohydrate metabolism disease	33	PARTICL	0.00245318
carbohydrate metabolism disease	34	MIR4435-2HG	0.0024251
carbohydrate metabolism disease	35	MIR181A1HG	0.00237995
carbohydrate metabolism disease	36	PEG3-AS1	0.00225318
carbohydrate metabolism disease	37	COPG2IT1	0.00155815
carbohydrate metabolism disease	38	PCAT4	0.00143922
carbohydrate metabolism disease	39	ADORA2A-AS1	0.00135088
carbohydrate metabolism disease	40	COL18A1-AS1	0.00132817
carbohydrate metabolism disease	41	LINC00293	0.00116874
carbohydrate metabolism disease	42	APTR	0.0011043
carbohydrate metabolism disease	43	DIO3OS	0.000875463
carbohydrate metabolism disease	44	OLMALINC	0.000833479
carbohydrate metabolism disease	45	HAS2-AS1	0.000688842
carbohydrate metabolism disease	46	RAD51-AS1	0.000550894
carbohydrate metabolism disease	47	LINC01602	0.000507399
carbohydrate metabolism disease	48	NUP50-AS1	0.000436154
carbohydrate metabolism disease	49	FAM30A	0.00041288
carbohydrate metabolism disease	50	LINC00273	0.000393241
disease by infectious agent	1	HCP5	0.998381
disease by infectious agent	2	MIR17HG	0.981385
disease by infectious agent	3	ATXN8OS	0.976308
disease by infectious agent	4	NRON	0.725833
disease by infectious agent	5	GAS5	0.71014
disease by infectious agent	6	MIF-AS1	0.70289
disease by infectious agent	7	GSTT1-AS1	0.700057
disease by infectious agent	8	OIP5-AS1	0.700051
disease by infectious agent	9	LINC00319	0.7
disease by infectious agent	10	CECR7	0.699998
disease by infectious agent	11	SNHG1	0.699996
disease by infectious agent	12	HOTAIRM1	0.699976
disease by infectious agent	13	MEG8	0.699959
disease by infectious agent	14	TP73-AS1	0.699959
disease by infectious agent	15	HOXA11-AS	0.699947
disease by infectious agent	16	LOXL1-AS1	0.699359
disease by infectious agent	17	GABPB1-AS1	0.699209
disease by infectious agent	18	LINC01184	0.699205
disease by infectious agent	19	MIR22HG	0.699144
disease by infectious agent	20	HELLPAR	0.699126
disease by infectious agent	21	PWRN1	0.699123
disease by infectious agent	22	LINC00315	0.699041
disease by infectious agent	23	LINC00575	0.698931
disease by infectious agent	24	TSIX	0.698596
disease by infectious agent	25	LINC01235	0.698478
disease by infectious agent	26	VLDLR-AS1	0.698275
disease by infectious agent	27	LINC00479	0.697538
disease by infectious agent	28	PWAR5	0.697364
disease by infectious agent	29	DBET	0.695821
disease by infectious agent	30	GHRLOS	0.694603
disease by infectious agent	31	DISC1FP1	0.694345
disease by infectious agent	32	B3GALT5-AS1	0.694045
disease by infectious agent	33	TTTY4	0.691058
disease by infectious agent	34	XACT	0.690793
disease by infectious agent	35	PARTICL	0.690542
disease by infectious agent	36	MIR4435-2HG	0.69037
disease by infectious agent	37	MIR181A1HG	0.689226
disease by infectious agent	38	PEG3-AS1	0.688165
disease by infectious agent	39	COPG2IT1	0.687428
disease by infectious agent	40	PCAT4	0.685609
disease by infectious agent	41	ADORA2A-AS1	0.681837
disease by infectious agent	42	COL18A1-AS1	0.676976
disease by infectious agent	43	LINC00293	0.676207
disease by infectious agent	44	CARMN	0.675109
disease by infectious agent	45	APTR	0.670492
disease by infectious agent	46	OLMALINC	0.669907
disease by infectious agent	47	HAS2-AS1	0.662321
disease by infectious agent	48	RAD51-AS1	0.658114
disease by infectious agent	49	LINC01602	0.650445
disease by infectious agent	50	NUP50-AS1	0.649302
sensory system disease	1	ERICH1-AS1	0.988079
sensory system disease	2	NALT1	0.7
sensory system disease	3	PISRT1	0.699575
sensory system disease	4	LINC01628	0.696986
sensory system disease	5	CDKN2B-AS1	0.689648
sensory system disease	6	OIP5-AS1	0.370565
sensory system disease	7	GATA3-AS1	0.369329
sensory system disease	8	PARD6G-AS1	0.310776
sensory system disease	9	LINC00477	0.270144
sensory system disease	10	LINC00319	0.267693
sensory system disease	11	CECR7	0.238121
sensory system disease	12	GABPB1-AS1	0.178831
sensory system disease	13	MEG8	0.141502
sensory system disease	14	LINC01184	0.0749972
sensory system disease	15	TTTY4	0.0213951
sensory system disease	16	CARMN	0.0132438
sensory system disease	17	DISC1FP1	0.0126982
sensory system disease	18	PWAR5	0.0101091
sensory system disease	19	LINC00479	0.00900302
sensory system disease	20	GHRLOS	0.00724319
sensory system disease	21	VLDLR-AS1	0.00360333
sensory system disease	22	TSIX	0.00289534
sensory system disease	23	LINC00575	0.0025517
sensory system disease	24	HELLPAR	0.00153786
sensory system disease	25	LINC00315	0.00148313
sensory system disease	26	FALEC	0.00140337
sensory system disease	27	MIR22HG	0.00124454
sensory system disease	28	LINC01235	0.00111695
sensory system disease	29	PWRN1	0.000769772
sensory system disease	30	B3GALT5-AS1	0.000669428
sensory system disease	31	GPR1-AS	0.000564541
sensory system disease	32	XACT	0.000528574
sensory system disease	33	PARTICL	0.00043757
sensory system disease	34	MIR4435-2HG	0.000404101
sensory system disease	35	MIR181A1HG	0.000354783
sensory system disease	36	PEG3-AS1	0.000333257
sensory system disease	37	COPG2IT1	0.000251255
sensory system disease	38	PCAT4	0.000232406
sensory system disease	39	ADORA2A-AS1	0.000224517
sensory system disease	40	COL18A1-AS1	0.000213764
sensory system disease	41	FMR1-AS1	0.000210245
sensory system disease	42	LINC00293	0.000200521
sensory system disease	43	DIO3OS	0.000183592
sensory system disease	44	OLMALINC	0.000173928
sensory system disease	45	HAS2-AS1	0.000144828
sensory system disease	46	RAD51-AS1	0.000141144
sensory system disease	47	LINC01602	0.000137916
sensory system disease	48	NUP50-AS1	0.000137854
sensory system disease	49	FAM30A	0.000110327
sensory system disease	50	LINC00273	9.76231e-05
monogenic disease	1	CDKN2B-AS1	0.943525
monogenic disease	2	MIR17HG	0.863236
monogenic disease	3	GATA3-AS1	0.726493
monogenic disease	4	LINC00477	0.699895
monogenic disease	5	PARD6G-AS1	0.693785
monogenic disease	6	LINC00319	0.690465
monogenic disease	7	CECR7	0.655453
monogenic disease	8	OIP5-AS1	0.593667
monogenic disease	9	GABPB1-AS1	0.568396
monogenic disease	10	MEG8	0.411034
monogenic disease	11	CARMN	0.329087
monogenic disease	12	PWAR5	0.317754
monogenic disease	13	LINC00479	0.238586
monogenic disease	14	TSIX	0.219149
monogenic disease	15	LINC00575	0.112262
monogenic disease	16	LINC00315	0.108245
monogenic disease	17	GHRLOS	0.098611
monogenic disease	18	LINC01184	0.0168677
monogenic disease	19	MIR22HG	0.0136562
monogenic disease	20	HELLPAR	0.0105249
monogenic disease	21	LINC01235	0.0097095
monogenic disease	22	VLDLR-AS1	0.00952021
monogenic disease	23	DISC1FP1	0.00526292
monogenic disease	24	DBET	0.00524315
monogenic disease	25	PWRN1	0.00318394
monogenic disease	26	TTTY4	0.00292957
monogenic disease	27	B3GALT5-AS1	0.00250692
monogenic disease	28	FMR1-AS1	0.00233073
monogenic disease	29	XACT	0.00193017
monogenic disease	30	PARTICL	0.0014909
monogenic disease	31	MIR4435-2HG	0.0014577
monogenic disease	32	MIR181A1HG	0.00143264
monogenic disease	33	PEG3-AS1	0.00130031
monogenic disease	34	COPG2IT1	0.00114694
monogenic disease	35	PCAT4	0.0011387
monogenic disease	36	ADORA2A-AS1	0.00111195
monogenic disease	37	COL18A1-AS1	0.0010575
monogenic disease	38	FALEC	0.000931022
monogenic disease	39	LINC00293	0.000814672
monogenic disease	40	DIO3OS	0.00080486
monogenic disease	41	OLMALINC	0.00078407
monogenic disease	42	HAS2-AS1	0.000728806
monogenic disease	43	RAD51-AS1	0.000727987
monogenic disease	44	LINC01602	0.000722094
monogenic disease	45	NUP50-AS1	0.000679182
monogenic disease	46	FAM30A	0.00060003
monogenic disease	47	LINC00273	0.000538235
monogenic disease	48	LRRC3DN	0.000536449
monogenic disease	49	APTR	0.000499791
monogenic disease	50	GPR1-AS	0.000494994
primary bacterial infectious disease	1	PARD6G-AS1	0.691452
primary bacterial infectious disease	2	GATA3-AS1	0.69058
primary bacterial infectious disease	3	LINC00477	0.579107
primary bacterial infectious disease	4	LINC00319	0.577549
primary bacterial infectious disease	5	OIP5-AS1	0.459031
primary bacterial infectious disease	6	MEG8	0.21389
primary bacterial infectious disease	7	CECR7	0.120889
primary bacterial infectious disease	8	GABPB1-AS1	0.0877176
primary bacterial infectious disease	9	VLDLR-AS1	0.0666029
primary bacterial infectious disease	10	CARMN	0.0633533
primary bacterial infectious disease	11	DBET	0.0414243
primary bacterial infectious disease	12	PWAR5	0.0388358
primary bacterial infectious disease	13	LINC00479	0.0181505
primary bacterial infectious disease	14	DISC1FP1	0.0123484
primary bacterial infectious disease	15	TSIX	0.00506803
primary bacterial infectious disease	16	LINC01235	0.00431355
primary bacterial infectious disease	17	LINC00575	0.0038914
primary bacterial infectious disease	18	PWRN1	0.00385988
primary bacterial infectious disease	19	LINC01184	0.00315824
primary bacterial infectious disease	20	TTTY4	0.00289083
primary bacterial infectious disease	21	GHRLOS	0.00275229
primary bacterial infectious disease	22	MIR22HG	0.0026544
primary bacterial infectious disease	23	HELLPAR	0.00247086
primary bacterial infectious disease	24	LINC00315	0.00233039
primary bacterial infectious disease	25	B3GALT5-AS1	0.000822149
primary bacterial infectious disease	26	FMR1-AS1	0.000811517
primary bacterial infectious disease	27	GPR1-AS	0.000735281
primary bacterial infectious disease	28	XACT	0.000577093
primary bacterial infectious disease	29	PARTICL	0.000546695
primary bacterial infectious disease	30	MIR4435-2HG	0.000433431
primary bacterial infectious disease	31	MIR181A1HG	0.000259765
primary bacterial infectious disease	32	PEG3-AS1	0.00024419
primary bacterial infectious disease	33	COPG2IT1	0.000226838
primary bacterial infectious disease	34	PCAT4	0.000197346
primary bacterial infectious disease	35	ADORA2A-AS1	0.000195478
primary bacterial infectious disease	36	COL18A1-AS1	0.000191
primary bacterial infectious disease	37	FALEC	0.000189862
primary bacterial infectious disease	38	LINC00293	0.000152398
primary bacterial infectious disease	39	DIO3OS	0.000146714
primary bacterial infectious disease	40	OLMALINC	0.000138451
primary bacterial infectious disease	41	HAS2-AS1	0.000135416
primary bacterial infectious disease	42	RAD51-AS1	0.0001338
primary bacterial infectious disease	43	LINC01602	0.000118002
primary bacterial infectious disease	44	NUP50-AS1	9.31351e-05
primary bacterial infectious disease	45	FAM30A	9.12937e-05
primary bacterial infectious disease	46	LINC00273	8.54421e-05
primary bacterial infectious disease	47	LRRC3DN	6.56473e-05
primary bacterial infectious disease	48	APTR	5.60141e-05
primary bacterial infectious disease	49	LINC01081	5.41254e-05
primary bacterial infectious disease	50	GNG12-AS1	5.13085e-05
orofacial cleft	1	UCA1	0.999893
orofacial cleft	2	PARD6G-AS1	0.218945
orofacial cleft	3	GATA3-AS1	0.0117019
orofacial cleft	4	LINC00477	0.00613769
orofacial cleft	5	LINC00319	0.00361892
orofacial cleft	6	CECR7	0.00345319
orofacial cleft	7	GABPB1-AS1	0.00342764
orofacial cleft	8	TTTY4	0.00296533
orofacial cleft	9	CARMN	0.00191958
orofacial cleft	10	PWAR5	0.00148373
orofacial cleft	11	LINC00479	0.00107723
orofacial cleft	12	TSIX	0.000918315
orofacial cleft	13	LINC00575	0.000911295
orofacial cleft	14	LINC00315	0.00055276
orofacial cleft	15	B3GALT5-AS1	0.000521418
orofacial cleft	16	LINC01184	0.000419025
orofacial cleft	17	GHRLOS	0.000419025
orofacial cleft	18	MIR22HG	0.000419025
orofacial cleft	19	HELLPAR	0.000419025
orofacial cleft	20	LINC01235	0.000419025
orofacial cleft	21	VLDLR-AS1	0.000419025
orofacial cleft	22	DISC1FP1	0.000364844
orofacial cleft	23	DBET	0.0003086
orofacial cleft	24	PWRN1	0.000303171
orofacial cleft	25	FALEC	0.000298065
orofacial cleft	26	LRRC3DN	0.000273673
orofacial cleft	27	GPR1-AS	0.000216099
orofacial cleft	28	XACT	0.000182038
orofacial cleft	29	PARTICL	0.000173501
orofacial cleft	30	MIR4435-2HG	0.000168227
orofacial cleft	31	MIR181A1HG	0.0001515
orofacial cleft	32	PEG3-AS1	0.000134133
orofacial cleft	33	COPG2IT1	0.000133551
orofacial cleft	34	PCAT4	0.000122998
orofacial cleft	35	ADORA2A-AS1	0.000120856
orofacial cleft	36	COL18A1-AS1	0.000112214
orofacial cleft	37	LINC00293	0.000102274
orofacial cleft	38	APTR	9.97857e-05
orofacial cleft	39	DIO3OS	9.97857e-05
orofacial cleft	40	OLMALINC	9.97857e-05
orofacial cleft	41	HAS2-AS1	9.97857e-05
orofacial cleft	42	RAD51-AS1	9.97857e-05
orofacial cleft	43	LINC01602	9.97857e-05
orofacial cleft	44	NUP50-AS1	9.97857e-05
orofacial cleft	45	FAM30A	9.97857e-05
orofacial cleft	46	LINC00273	9.97857e-05
orofacial cleft	47	FMR1-AS1	9.97857e-05
orofacial cleft	48	LINC01081	9.97857e-05
orofacial cleft	49	GNG12-AS1	9.97857e-05
orofacial cleft	50	AGAP2-AS1	9.97857e-05
respiratory system cancer	1	KIRREL3-AS3	0.999891
respiratory system cancer	2	SNHG1	0.999888
respiratory system cancer	3	MEG3	0.999601
respiratory system cancer	4	ERICH1-AS1	0.99936
respiratory system cancer	5	H19	0.998259
respiratory system cancer	6	HNF1A-AS1	0.997992
respiratory system cancer	7	LINC01133	0.988602
respiratory system cancer	8	XIST	0.98812
respiratory system cancer	9	LSINCT5	0.961313
respiratory system cancer	10	GAS5	0.937263
respiratory system cancer	11	HOTAIR	0.936889
respiratory system cancer	12	LINC01628	0.932716
respiratory system cancer	13	LINC00473	0.910594
respiratory system cancer	14	MALAT1	0.769139
respiratory system cancer	15	NEAT1	0.756976
respiratory system cancer	16	CDKN2B-AS1	0.641615
respiratory system cancer	17	UCA1	0.557341
respiratory system cancer	18	GACAT2	0.486858
respiratory system cancer	19	MIR17HG	0.448215
respiratory system cancer	20	PVT1	0.391791
respiratory system cancer	21	AFAP1-AS1	0.389791
respiratory system cancer	22	PARD6G-AS1	0.36718
respiratory system cancer	23	GATA3-AS1	0.36329
respiratory system cancer	24	LINC00477	0.342134
respiratory system cancer	25	CECR7	0.337047
respiratory system cancer	26	LINC00319	0.298447
respiratory system cancer	27	GABPB1-AS1	0.29577
respiratory system cancer	28	MEG8	0.295401
respiratory system cancer	29	HELLPAR	0.291817
respiratory system cancer	30	CARMN	0.291792
respiratory system cancer	31	LINC00479	0.288229
respiratory system cancer	32	PWAR5	0.273775
respiratory system cancer	33	PWRN1	0.248223
respiratory system cancer	34	TSIX	0.206341
respiratory system cancer	35	TTTY4	0.186392
respiratory system cancer	36	GHRLOS	0.186218
respiratory system cancer	37	LINC00315	0.162055
respiratory system cancer	38	LINC01184	0.1474
respiratory system cancer	39	MIR22HG	0.130494
respiratory system cancer	40	LINC00575	0.125909
respiratory system cancer	41	LRRC3DN	0.12409
respiratory system cancer	42	FMR1-AS1	0.097343
respiratory system cancer	43	XACT	0.0638392
respiratory system cancer	44	PARTICL	0.0571874
respiratory system cancer	45	MIR4435-2HG	0.0522758
respiratory system cancer	46	MIR181A1HG	0.0353951
respiratory system cancer	47	PEG3-AS1	0.0286408
respiratory system cancer	48	COPG2IT1	0.0242537
respiratory system cancer	49	PCAT4	0.021752
respiratory system cancer	50	ADORA2A-AS1	0.0211275
primary cutaneous amyloidosis	1	PCA3	0.853402
primary cutaneous amyloidosis	2	PCGEM1	0.481314
primary cutaneous amyloidosis	3	GATA3-AS1	0.368185
primary cutaneous amyloidosis	4	LINC00477	0.341846
primary cutaneous amyloidosis	5	PARD6G-AS1	0.287915
primary cutaneous amyloidosis	6	LINC00319	0.184165
primary cutaneous amyloidosis	7	CECR7	0.0134687
primary cutaneous amyloidosis	8	GABPB1-AS1	0.00644644
primary cutaneous amyloidosis	9	MEG8	0.0050742
primary cutaneous amyloidosis	10	B3GALT5-AS1	0.00422105
primary cutaneous amyloidosis	11	CARMN	0.00107102
primary cutaneous amyloidosis	12	PWAR5	0.000982906
primary cutaneous amyloidosis	13	LINC00479	0.000724883
primary cutaneous amyloidosis	14	TSIX	0.000332951
primary cutaneous amyloidosis	15	LINC00575	0.000191017
primary cutaneous amyloidosis	16	PWRN1	0.000170432
primary cutaneous amyloidosis	17	TTTY4	0.000162856
primary cutaneous amyloidosis	18	LINC01184	0.000135119
primary cutaneous amyloidosis	19	GHRLOS	0.000127601
primary cutaneous amyloidosis	20	MIR22HG	0.000126307
primary cutaneous amyloidosis	21	HELLPAR	0.000110497
primary cutaneous amyloidosis	22	LINC01235	0.000103564
primary cutaneous amyloidosis	23	VLDLR-AS1	8.58089e-05
primary cutaneous amyloidosis	24	DISC1FP1	7.66264e-05
primary cutaneous amyloidosis	25	DBET	5.10857e-05
primary cutaneous amyloidosis	26	LINC00315	4.43317e-05
primary cutaneous amyloidosis	27	FALEC	4.10169e-05
primary cutaneous amyloidosis	28	LRRC3DN	2.95786e-05
primary cutaneous amyloidosis	29	GPR1-AS	2.32432e-05
primary cutaneous amyloidosis	30	XACT	2.17412e-05
primary cutaneous amyloidosis	31	PARTICL	2.17412e-05
primary cutaneous amyloidosis	32	MIR4435-2HG	2.17412e-05
primary cutaneous amyloidosis	33	MIR181A1HG	2.17412e-05
primary cutaneous amyloidosis	34	PEG3-AS1	2.17412e-05
primary cutaneous amyloidosis	35	COPG2IT1	2.17412e-05
primary cutaneous amyloidosis	36	PCAT4	2.04893e-05
primary cutaneous amyloidosis	37	ADORA2A-AS1	1.89813e-05
primary cutaneous amyloidosis	38	COL18A1-AS1	1.73193e-05
primary cutaneous amyloidosis	39	LINC00293	1.38859e-05
primary cutaneous amyloidosis	40	APTR	1.38744e-05
primary cutaneous amyloidosis	41	DIO3OS	1.38613e-05
primary cutaneous amyloidosis	42	OLMALINC	1.06671e-05
primary cutaneous amyloidosis	43	HAS2-AS1	1.04738e-05
primary cutaneous amyloidosis	44	RAD51-AS1	9.21347e-06
primary cutaneous amyloidosis	45	LINC01602	8.8782e-06
primary cutaneous amyloidosis	46	NUP50-AS1	8.65994e-06
primary cutaneous amyloidosis	47	FAM30A	8.59962e-06
primary cutaneous amyloidosis	48	LINC00273	8.00012e-06
primary cutaneous amyloidosis	49	FMR1-AS1	7.55567e-06
primary cutaneous amyloidosis	50	LINC01081	7.42001e-06
organ system cancer	1	KIRREL3-AS3	0.999972
organ system cancer	2	NBAT1	0.999926
organ system cancer	3	LINC00472	0.99984
organ system cancer	4	HCP5	0.926076
organ system cancer	5	CYTOR	0.79531
organ system cancer	6	EGOT	0.791733
organ system cancer	7	PCGEM1	0.762175
organ system cancer	8	CASC2	0.745302
organ system cancer	9	PTCSC2	0.713254
organ system cancer	10	HCCAT5	0.702
organ system cancer	11	DISC2	0.700997
organ system cancer	12	CASC16	0.700247
organ system cancer	13	BCYRN1	0.700089
organ system cancer	14	TUSC8	0.700001
organ system cancer	15	HOTAIR	0.69879
organ system cancer	16	MIR503HG	0.664815
organ system cancer	17	LINC01628	0.603631
organ system cancer	18	C5orf66-AS2	0.495639
organ system cancer	19	GHET1	0.495442
organ system cancer	20	LUCAT1	0.495442
organ system cancer	21	MIR155HG	0.389096
organ system cancer	22	LINC00961	0.370961
organ system cancer	23	LINC-PINT	0.299999
organ system cancer	24	PANDAR	0.299901
organ system cancer	25	LINC00467	0.299683
organ system cancer	26	TDRG1	0.299616
organ system cancer	27	BCAR4	0.292802
organ system cancer	28	HCG27	0.275392
organ system cancer	29	XIST	0.274866
organ system cancer	30	NEAT1	0.273399
organ system cancer	31	ERICH1-AS1	0.271854
organ system cancer	32	MEG3	0.2685
organ system cancer	33	TINCR	0.246685
organ system cancer	34	LINC00675	0.210672
organ system cancer	35	MIR7-3HG	0.13339
organ system cancer	36	SCHLAP1	0.130913
organ system cancer	37	BLACAT1	0.0931407
organ system cancer	38	LINC00687	0.0811873
organ system cancer	39	HNF1A-AS1	0.0715198
organ system cancer	40	ZFAS1	0.0514711
organ system cancer	41	DLEU2	0.0211788
organ system cancer	42	MIR99AHG	0.0199069
organ system cancer	43	LINC00629	0.011174
organ system cancer	44	HCG4	0.00845966
organ system cancer	45	LSINCT5	0.00542682
organ system cancer	46	LINC00261	0.00515749
organ system cancer	47	LINC00583	0.00400424
organ system cancer	48	ZEB1-AS1	0.00342564
organ system cancer	49	LINC01133	0.00342564
organ system cancer	50	HAND2-AS1	0.00342564
cell type cancer	1	KIRREL3-AS3	0.999998
cell type cancer	2	DISC2	0.999994
cell type cancer	3	ESRG	0.999991
cell type cancer	4	PTCSC2	0.999956
cell type cancer	5	SAMMSON	0.999955
cell type cancer	6	LINC01133	0.999929
cell type cancer	7	LINC00654	0.999898
cell type cancer	8	HYMAI	0.999876
cell type cancer	9	LINC00687	0.99981
cell type cancer	10	GAS5	0.99968
cell type cancer	11	TINCR	0.99961
cell type cancer	12	NEAT1	0.999509
cell type cancer	13	MEG3	0.999409
cell type cancer	14	SPRY4-IT1	0.999114
cell type cancer	15	MIR17HG	0.998657
cell type cancer	16	AFAP1-AS1	0.99863
cell type cancer	17	LINC01556	0.9986
cell type cancer	18	DBH-AS1	0.998517
cell type cancer	19	LINC00675	0.998452
cell type cancer	20	LINC00663	0.998406
cell type cancer	21	H19	0.99838
cell type cancer	22	HNF1A-AS1	0.998303
cell type cancer	23	CCDC26	0.998257
cell type cancer	24	LINC00974	0.998132
cell type cancer	25	KCNQ1OT1	0.99772
cell type cancer	26	EWSAT1	0.99747
cell type cancer	27	CASC2	0.997423
cell type cancer	28	PANDAR	0.997345
cell type cancer	29	LINC00032	0.996696
cell type cancer	30	ZEB1-AS1	0.995967
cell type cancer	31	CYTOR	0.995253
cell type cancer	32	WT1-AS	0.995184
cell type cancer	33	IGF2-AS	0.994356
cell type cancer	34	CCAT2	0.993782
cell type cancer	35	HOTAIR	0.993121
cell type cancer	36	HOTTIP	0.993065
cell type cancer	37	CCAT1	0.992793
cell type cancer	38	CDKN2B-AS1	0.991488
cell type cancer	39	BANCR	0.988868
cell type cancer	40	GACAT2	0.987764
cell type cancer	41	HULC	0.985515
cell type cancer	42	PVT1	0.98478
cell type cancer	43	LINC-PINT	0.984747
cell type cancer	44	MIR194-2HG	0.984747
cell type cancer	45	UCA1	0.983863
cell type cancer	46	PCA3	0.983793
cell type cancer	47	LINC00312	0.982513
cell type cancer	48	MALAT1	0.98234
cell type cancer	49	PICSAR	0.978641
cell type cancer	50	CECR7	0.975281
autosomal dominant disease	1	MIR17HG	0.967281
autosomal dominant disease	2	CDKN2B-AS1	0.705469
autosomal dominant disease	3	GATA3-AS1	0.699998
autosomal dominant disease	4	LINC00477	0.699992
autosomal dominant disease	5	PARD6G-AS1	0.690854
autosomal dominant disease	6	LINC00319	0.639077
autosomal dominant disease	7	CECR7	0.0982752
autosomal dominant disease	8	GABPB1-AS1	0.0571414
autosomal dominant disease	9	MEG8	0.0292905
autosomal dominant disease	10	B3GALT5-AS1	0.00512546
autosomal dominant disease	11	CARMN	0.00471348
autosomal dominant disease	12	PWAR5	0.00442394
autosomal dominant disease	13	LINC00479	0.00118704
autosomal dominant disease	14	TSIX	0.000983604
autosomal dominant disease	15	LINC00575	0.000938227
autosomal dominant disease	16	LINC00315	0.00064207
autosomal dominant disease	17	GHRLOS	0.000366787
autosomal dominant disease	18	LINC01184	0.000222063
autosomal dominant disease	19	MIR22HG	7.95605e-05
autosomal dominant disease	20	HELLPAR	1.89663e-05
autosomal dominant disease	21	LINC01235	1.87639e-05
autosomal dominant disease	22	VLDLR-AS1	1.44573e-05
autosomal dominant disease	23	DISC1FP1	8.33489e-06
autosomal dominant disease	24	DBET	6.03247e-06
autosomal dominant disease	25	PWRN1	3.72482e-06
autosomal dominant disease	26	TTTY4	3.32141e-06
autosomal dominant disease	27	GPR1-AS	3.29613e-06
autosomal dominant disease	28	FMR1-AS1	3.2386e-06
autosomal dominant disease	29	XACT	3.02909e-06
autosomal dominant disease	30	PARTICL	3.00285e-06
autosomal dominant disease	31	MIR4435-2HG	2.71958e-06
autosomal dominant disease	32	MIR181A1HG	2.66761e-06
autosomal dominant disease	33	PEG3-AS1	2.65991e-06
autosomal dominant disease	34	COPG2IT1	2.43354e-06
autosomal dominant disease	35	PCAT4	2.40042e-06
autosomal dominant disease	36	ADORA2A-AS1	2.20016e-06
autosomal dominant disease	37	COL18A1-AS1	2.12059e-06
autosomal dominant disease	38	FALEC	1.9528e-06
autosomal dominant disease	39	LINC00293	1.88951e-06
autosomal dominant disease	40	DIO3OS	1.85919e-06
autosomal dominant disease	41	OLMALINC	1.6509e-06
autosomal dominant disease	42	HAS2-AS1	1.51805e-06
autosomal dominant disease	43	RAD51-AS1	1.06673e-06
autosomal dominant disease	44	LINC01602	1.01753e-06
autosomal dominant disease	45	NUP50-AS1	9.67747e-07
autosomal dominant disease	46	FAM30A	8.47553e-07
autosomal dominant disease	47	LINC00273	8.36682e-07
autosomal dominant disease	48	LRRC3DN	8.34904e-07
autosomal dominant disease	49	APTR	8.04916e-07
autosomal dominant disease	50	LINC01081	7.5574e-07
autosomal genetic disease	1	CDKN2B-AS1	0.816607
autosomal genetic disease	2	GATA3-AS1	0.700004
autosomal genetic disease	3	LINC00477	0.699755
autosomal genetic disease	4	PARD6G-AS1	0.695387
autosomal genetic disease	5	LINC00319	0.694039
autosomal genetic disease	6	CECR7	0.647252
autosomal genetic disease	7	GABPB1-AS1	0.595121
autosomal genetic disease	8	MEG8	0.123391
autosomal genetic disease	9	B3GALT5-AS1	0.0960506
autosomal genetic disease	10	TTTY4	0.0706345
autosomal genetic disease	11	CARMN	0.0327654
autosomal genetic disease	12	PWAR5	0.0299455
autosomal genetic disease	13	LINC00479	0.0294825
autosomal genetic disease	14	TSIX	0.0238322
autosomal genetic disease	15	LINC00575	0.0218236
autosomal genetic disease	16	LINC01184	0.00066933
autosomal genetic disease	17	PWRN1	0.000630637
autosomal genetic disease	18	GHRLOS	0.000499642
autosomal genetic disease	19	MIR22HG	0.00047176
autosomal genetic disease	20	HELLPAR	0.000463654
autosomal genetic disease	21	LINC01235	0.000461454
autosomal genetic disease	22	VLDLR-AS1	0.00044864
autosomal genetic disease	23	DISC1FP1	0.000215296
autosomal genetic disease	24	DBET	0.000199944
autosomal genetic disease	25	LINC00315	9.4424e-05
autosomal genetic disease	26	FALEC	7.58384e-05
autosomal genetic disease	27	GPR1-AS	7.42088e-05
autosomal genetic disease	28	LRRC3DN	5.21824e-05
autosomal genetic disease	29	XACT	3.04988e-05
autosomal genetic disease	30	PARTICL	2.94967e-05
autosomal genetic disease	31	MIR4435-2HG	2.71955e-05
autosomal genetic disease	32	MIR181A1HG	2.17391e-05
autosomal genetic disease	33	PEG3-AS1	2.17167e-05
autosomal genetic disease	34	COPG2IT1	2.15093e-05
autosomal genetic disease	35	PCAT4	2.0706e-05
autosomal genetic disease	36	ADORA2A-AS1	2.05755e-05
autosomal genetic disease	37	COL18A1-AS1	2.00728e-05
autosomal genetic disease	38	LINC00293	1.90855e-05
autosomal genetic disease	39	APTR	1.74382e-05
autosomal genetic disease	40	DIO3OS	1.61766e-05
autosomal genetic disease	41	OLMALINC	1.5714e-05
autosomal genetic disease	42	HAS2-AS1	1.52351e-05
autosomal genetic disease	43	RAD51-AS1	1.40632e-05
autosomal genetic disease	44	LINC01602	1.38504e-05
autosomal genetic disease	45	NUP50-AS1	1.34012e-05
autosomal genetic disease	46	FAM30A	1.27764e-05
autosomal genetic disease	47	LINC00273	1.19659e-05
autosomal genetic disease	48	FMR1-AS1	1.11889e-05
autosomal genetic disease	49	LINC01081	1.06738e-05
autosomal genetic disease	50	GNG12-AS1	9.25898e-06
diffuse large B-cell lymphoma	1	HULC	0.999616
diffuse large B-cell lymphoma	2	GATA3-AS1	0.991841
diffuse large B-cell lymphoma	3	LINC00477	0.700002
diffuse large B-cell lymphoma	4	PARD6G-AS1	0.69978
diffuse large B-cell lymphoma	5	LINC00319	0.697993
diffuse large B-cell lymphoma	6	CECR7	0.68808
diffuse large B-cell lymphoma	7	GABPB1-AS1	0.67743
diffuse large B-cell lymphoma	8	OIP5-AS1	0.55771
diffuse large B-cell lymphoma	9	B3GALT5-AS1	0.493539
diffuse large B-cell lymphoma	10	TTTY4	0.354076
diffuse large B-cell lymphoma	11	CARMN	0.307389
diffuse large B-cell lymphoma	12	PWAR5	0.281484
diffuse large B-cell lymphoma	13	LINC00479	0.27661
diffuse large B-cell lymphoma	14	TSIX	0.25106
diffuse large B-cell lymphoma	15	LINC00575	0.196763
diffuse large B-cell lymphoma	16	LINC00315	0.196083
diffuse large B-cell lymphoma	17	GHRLOS	0.15887
diffuse large B-cell lymphoma	18	LINC01184	0.07039
diffuse large B-cell lymphoma	19	MIR22HG	0.0348998
diffuse large B-cell lymphoma	20	HELLPAR	0.0341473
diffuse large B-cell lymphoma	21	LINC01235	0.0139707
diffuse large B-cell lymphoma	22	VLDLR-AS1	0.00755298
diffuse large B-cell lymphoma	23	DISC1FP1	0.00748462
diffuse large B-cell lymphoma	24	DBET	0.00587826
diffuse large B-cell lymphoma	25	PWRN1	0.00326243
diffuse large B-cell lymphoma	26	FALEC	0.0025431
diffuse large B-cell lymphoma	27	GPR1-AS	0.00238239
diffuse large B-cell lymphoma	28	LRRC3DN	0.00208548
diffuse large B-cell lymphoma	29	XACT	0.00199181
diffuse large B-cell lymphoma	30	PARTICL	0.00162648
diffuse large B-cell lymphoma	31	MIR4435-2HG	0.00119571
diffuse large B-cell lymphoma	32	MIR181A1HG	0.000599955
diffuse large B-cell lymphoma	33	PEG3-AS1	0.000538627
diffuse large B-cell lymphoma	34	COPG2IT1	0.000395635
diffuse large B-cell lymphoma	35	PCAT4	0.000372011
diffuse large B-cell lymphoma	36	ADORA2A-AS1	0.000212815
diffuse large B-cell lymphoma	37	COL18A1-AS1	0.000211306
diffuse large B-cell lymphoma	38	LINC00293	0.00016219
diffuse large B-cell lymphoma	39	APTR	0.000114505
diffuse large B-cell lymphoma	40	DIO3OS	9.27837e-05
diffuse large B-cell lymphoma	41	OLMALINC	8.22219e-05
diffuse large B-cell lymphoma	42	HAS2-AS1	7.19457e-05
diffuse large B-cell lymphoma	43	RAD51-AS1	6.81465e-05
diffuse large B-cell lymphoma	44	LINC01602	4.35134e-05
diffuse large B-cell lymphoma	45	NUP50-AS1	3.89129e-05
diffuse large B-cell lymphoma	46	FAM30A	3.49279e-05
diffuse large B-cell lymphoma	47	LINC00273	3.33909e-05
diffuse large B-cell lymphoma	48	FMR1-AS1	3.33909e-05
diffuse large B-cell lymphoma	49	LINC01081	3.33909e-05
diffuse large B-cell lymphoma	50	GNG12-AS1	3.33909e-05
phaeochromocytoma	1	MEG3	0.998401
phaeochromocytoma	2	GATA3-AS1	0.690701
phaeochromocytoma	3	LINC00477	0.674236
phaeochromocytoma	4	PARD6G-AS1	0.516292
phaeochromocytoma	5	LINC00319	0.508042
phaeochromocytoma	6	OIP5-AS1	0.216663
phaeochromocytoma	7	CECR7	0.17737
phaeochromocytoma	8	GABPB1-AS1	0.115978
phaeochromocytoma	9	MEG8	0.068971
phaeochromocytoma	10	B3GALT5-AS1	0.0610981
phaeochromocytoma	11	CARMN	0.0361433
phaeochromocytoma	12	PWAR5	0.0342499
phaeochromocytoma	13	LINC00479	0.0303152
phaeochromocytoma	14	TSIX	0.0285827
phaeochromocytoma	15	LINC00575	0.0231098
phaeochromocytoma	16	LINC01184	0.0144033
phaeochromocytoma	17	PWRN1	0.0108232
phaeochromocytoma	18	GHRLOS	0.00927781
phaeochromocytoma	19	MIR22HG	0.00250014
phaeochromocytoma	20	HELLPAR	0.00215406
phaeochromocytoma	21	LINC01235	0.00126533
phaeochromocytoma	22	VLDLR-AS1	0.00060916
phaeochromocytoma	23	DISC1FP1	0.00055564
phaeochromocytoma	24	DBET	0.000504646
phaeochromocytoma	25	LINC00315	0.000457844
phaeochromocytoma	26	TTTY4	0.00041941
phaeochromocytoma	27	FMR1-AS1	0.000397599
phaeochromocytoma	28	GPR1-AS	0.000334392
phaeochromocytoma	29	XACT	0.000319892
phaeochromocytoma	30	PARTICL	0.000319892
phaeochromocytoma	31	MIR4435-2HG	0.000319892
phaeochromocytoma	32	MIR181A1HG	0.000319892
phaeochromocytoma	33	PEG3-AS1	0.000319892
phaeochromocytoma	34	COPG2IT1	0.000319892
phaeochromocytoma	35	PCAT4	0.000241536
phaeochromocytoma	36	ADORA2A-AS1	0.000219672
phaeochromocytoma	37	COL18A1-AS1	0.000183405
phaeochromocytoma	38	FALEC	0.000175656
phaeochromocytoma	39	LINC00293	0.000156283
phaeochromocytoma	40	DIO3OS	0.00015547
phaeochromocytoma	41	OLMALINC	0.000154505
phaeochromocytoma	42	HAS2-AS1	0.000153511
phaeochromocytoma	43	RAD51-AS1	0.00014774
phaeochromocytoma	44	LINC01602	0.000105003
phaeochromocytoma	45	NUP50-AS1	9.04394e-05
phaeochromocytoma	46	FAM30A	8.0734e-05
phaeochromocytoma	47	LINC00273	7.61013e-05
phaeochromocytoma	48	LRRC3DN	7.58112e-05
phaeochromocytoma	49	APTR	7.58112e-05
phaeochromocytoma	50	LINC01081	7.58112e-05
eye adnexa disease	1	PISRT1	0.865576
eye adnexa disease	2	PARD6G-AS1	0.666745
eye adnexa disease	3	GATA3-AS1	0.00799099
eye adnexa disease	4	LINC00477	0.00416729
eye adnexa disease	5	CECR7	0.0034472
eye adnexa disease	6	LINC00319	0.00300723
eye adnexa disease	7	GABPB1-AS1	0.00136732
eye adnexa disease	8	MEG8	0.000775457
eye adnexa disease	9	TTTY4	0.000551015
eye adnexa disease	10	CARMN	0.000494632
eye adnexa disease	11	PWAR5	0.000276273
eye adnexa disease	12	LINC00479	0.00023875
eye adnexa disease	13	TSIX	0.000191672
eye adnexa disease	14	LINC00575	0.000109849
eye adnexa disease	15	B3GALT5-AS1	9.59295e-05
eye adnexa disease	16	PWRN1	8.24554e-05
eye adnexa disease	17	LINC01184	3.08507e-05
eye adnexa disease	18	GHRLOS	1.81805e-05
eye adnexa disease	19	MIR22HG	1.47951e-05
eye adnexa disease	20	HELLPAR	1.40553e-05
eye adnexa disease	21	LINC01235	1.03685e-05
eye adnexa disease	22	VLDLR-AS1	1.01405e-05
eye adnexa disease	23	DISC1FP1	1.01065e-05
eye adnexa disease	24	DBET	1.00372e-05
eye adnexa disease	25	LINC00315	9.14594e-06
eye adnexa disease	26	FALEC	9.14594e-06
eye adnexa disease	27	GPR1-AS	9.14594e-06
eye adnexa disease	28	LRRC3DN	9.14594e-06
eye adnexa disease	29	XACT	9.14594e-06
eye adnexa disease	30	PARTICL	9.14594e-06
eye adnexa disease	31	MIR4435-2HG	8.78603e-06
eye adnexa disease	32	MIR181A1HG	7.75566e-06
eye adnexa disease	33	PEG3-AS1	7.56521e-06
eye adnexa disease	34	COPG2IT1	6.02293e-06
eye adnexa disease	35	PCAT4	5.46573e-06
eye adnexa disease	36	ADORA2A-AS1	5.46388e-06
eye adnexa disease	37	COL18A1-AS1	5.17707e-06
eye adnexa disease	38	LINC00293	4.59717e-06
eye adnexa disease	39	APTR	3.2106e-06
eye adnexa disease	40	DIO3OS	2.90029e-06
eye adnexa disease	41	OLMALINC	2.78712e-06
eye adnexa disease	42	HAS2-AS1	2.73025e-06
eye adnexa disease	43	RAD51-AS1	2.6203e-06
eye adnexa disease	44	LINC01602	2.61749e-06
eye adnexa disease	45	NUP50-AS1	2.31635e-06
eye adnexa disease	46	FAM30A	2.28859e-06
eye adnexa disease	47	LINC00273	2.22576e-06
eye adnexa disease	48	FMR1-AS1	2.20774e-06
eye adnexa disease	49	LINC01081	2.09036e-06
eye adnexa disease	50	GNG12-AS1	2.09036e-06
artery disease	1	MIR17HG	0.700719
artery disease	2	H19	0.699622
artery disease	3	ESRG	0.698268
artery disease	4	MIAT	0.698151
artery disease	5	CDKN2A-AS1	0.69633
artery disease	6	CDKN2B-AS1	0.69323
artery disease	7	MALAT1	0.661136
artery disease	8	OIP5-AS1	0.573284
artery disease	9	GATA3-AS1	0.553972
artery disease	10	LINC00477	0.358123
artery disease	11	PARD6G-AS1	0.182185
artery disease	12	LINC00319	0.103069
artery disease	13	CECR7	0.0573262
artery disease	14	GABPB1-AS1	0.0484317
artery disease	15	MEG8	0.0251861
artery disease	16	PWAR5	0.0181452
artery disease	17	TSIX	0.0174071
artery disease	18	LINC00479	0.0088956
artery disease	19	LINC00575	0.0056356
artery disease	20	LINC01184	0.00462449
artery disease	21	PWRN1	0.00439779
artery disease	22	GHRLOS	0.00425539
artery disease	23	MIR22HG	0.00377299
artery disease	24	HELLPAR	0.00316324
artery disease	25	LINC01235	0.00306512
artery disease	26	VLDLR-AS1	0.00170255
artery disease	27	DISC1FP1	0.00150536
artery disease	28	DBET	0.00146185
artery disease	29	LINC00315	0.00145427
artery disease	30	CARMN	0.00104934
artery disease	31	B3GALT5-AS1	0.000944362
artery disease	32	FALEC	0.000923191
artery disease	33	XACT	0.000911814
artery disease	34	PARTICL	0.000694572
artery disease	35	MIR4435-2HG	0.000617272
artery disease	36	MIR181A1HG	0.000609837
artery disease	37	PEG3-AS1	0.000553825
artery disease	38	COPG2IT1	0.000477694
artery disease	39	PCAT4	0.000406366
artery disease	40	ADORA2A-AS1	0.000372731
artery disease	41	COL18A1-AS1	0.000327265
artery disease	42	LINC00293	0.000268518
artery disease	43	APTR	0.000260927
artery disease	44	DIO3OS	0.000243289
artery disease	45	OLMALINC	0.000219588
artery disease	46	HAS2-AS1	0.000203559
artery disease	47	RAD51-AS1	0.000199567
artery disease	48	LINC01602	0.000194536
artery disease	49	NUP50-AS1	0.000187726
artery disease	50	FAM30A	0.000185295
pericardium disease	1	HCP5	0.999982
pericardium disease	2	GATA3-AS1	0.0418765
pericardium disease	3	LINC00477	0.0204148
pericardium disease	4	PARD6G-AS1	0.0111324
pericardium disease	5	LINC00319	0.00526843
pericardium disease	6	CECR7	0.0021696
pericardium disease	7	GABPB1-AS1	0.000522803
pericardium disease	8	TTTY4	0.000251975
pericardium disease	9	CARMN	0.000247748
pericardium disease	10	PWAR5	0.000182406
pericardium disease	11	LINC00479	0.00013594
pericardium disease	12	TSIX	0.00012768
pericardium disease	13	LINC00575	9.31898e-05
pericardium disease	14	LINC00315	6.57794e-05
pericardium disease	15	B3GALT5-AS1	6.57629e-05
pericardium disease	16	LINC01184	5.30394e-05
pericardium disease	17	GHRLOS	5.21922e-05
pericardium disease	18	MIR22HG	5.21914e-05
pericardium disease	19	HELLPAR	4.65128e-05
pericardium disease	20	LINC01235	4.13697e-05
pericardium disease	21	VLDLR-AS1	3.99768e-05
pericardium disease	22	DISC1FP1	3.99768e-05
pericardium disease	23	DBET	3.99768e-05
pericardium disease	24	PWRN1	3.99768e-05
pericardium disease	25	FALEC	3.99768e-05
pericardium disease	26	GPR1-AS	3.99768e-05
pericardium disease	27	LRRC3DN	3.76097e-05
pericardium disease	28	XACT	3.21006e-05
pericardium disease	29	PARTICL	1.92077e-05
pericardium disease	30	MIR4435-2HG	1.78209e-05
pericardium disease	31	MIR181A1HG	1.78089e-05
pericardium disease	32	PEG3-AS1	1.78062e-05
pericardium disease	33	COPG2IT1	1.51739e-05
pericardium disease	34	PCAT4	1.50713e-05
pericardium disease	35	ADORA2A-AS1	1.2347e-05
pericardium disease	36	COL18A1-AS1	1.21634e-05
pericardium disease	37	LINC00293	1.21283e-05
pericardium disease	38	APTR	1.16101e-05
pericardium disease	39	DIO3OS	1.0537e-05
pericardium disease	40	OLMALINC	9.91474e-06
pericardium disease	41	HAS2-AS1	9.91474e-06
pericardium disease	42	RAD51-AS1	9.91474e-06
pericardium disease	43	LINC01602	9.91474e-06
pericardium disease	44	NUP50-AS1	9.91474e-06
pericardium disease	45	FAM30A	9.91474e-06
pericardium disease	46	LINC00273	9.91474e-06
pericardium disease	47	FMR1-AS1	9.91474e-06
pericardium disease	48	LINC01081	9.91474e-06
pericardium disease	49	GNG12-AS1	9.91474e-06
pericardium disease	50	CASC8	9.91474e-06
peripheral artery disease	1	CDKN2B-AS1	0.998046
peripheral artery disease	2	GATA3-AS1	0.68591
peripheral artery disease	3	LINC00477	0.611362
peripheral artery disease	4	PARD6G-AS1	0.0889198
peripheral artery disease	5	CECR7	0.0385463
peripheral artery disease	6	LINC00319	0.0261032
peripheral artery disease	7	GABPB1-AS1	0.00887969
peripheral artery disease	8	MEG8	0.0044625
peripheral artery disease	9	B3GALT5-AS1	0.0040303
peripheral artery disease	10	TTTY4	0.00316607
peripheral artery disease	11	CARMN	0.00187907
peripheral artery disease	12	PWAR5	0.00139253
peripheral artery disease	13	LINC00479	0.00119636
peripheral artery disease	14	TSIX	0.00106224
peripheral artery disease	15	LINC00575	0.000564058
peripheral artery disease	16	LINC01184	0.00053207
peripheral artery disease	17	PWRN1	0.000323607
peripheral artery disease	18	GHRLOS	0.000318921
peripheral artery disease	19	MIR22HG	0.000206569
peripheral artery disease	20	HELLPAR	0.000200825
peripheral artery disease	21	LINC01235	0.000200825
peripheral artery disease	22	VLDLR-AS1	0.000200825
peripheral artery disease	23	DISC1FP1	0.000200825
peripheral artery disease	24	DBET	0.000200825
peripheral artery disease	25	LINC00315	0.000200825
peripheral artery disease	26	FALEC	0.000194091
peripheral artery disease	27	GPR1-AS	0.000169027
peripheral artery disease	28	LRRC3DN	0.000158222
peripheral artery disease	29	XACT	0.000112058
peripheral artery disease	30	PARTICL	0.000103217
peripheral artery disease	31	MIR4435-2HG	8.19242e-05
peripheral artery disease	32	MIR181A1HG	8.0489e-05
peripheral artery disease	33	PEG3-AS1	6.55291e-05
peripheral artery disease	34	COPG2IT1	6.35863e-05
peripheral artery disease	35	PCAT4	5.89186e-05
peripheral artery disease	36	ADORA2A-AS1	5.85299e-05
peripheral artery disease	37	COL18A1-AS1	5.0488e-05
peripheral artery disease	38	LINC00293	4.83444e-05
peripheral artery disease	39	APTR	4.40395e-05
peripheral artery disease	40	DIO3OS	3.97087e-05
peripheral artery disease	41	OLMALINC	3.48215e-05
peripheral artery disease	42	HAS2-AS1	3.34344e-05
peripheral artery disease	43	RAD51-AS1	3.34344e-05
peripheral artery disease	44	LINC01602	3.34344e-05
peripheral artery disease	45	NUP50-AS1	3.34344e-05
peripheral artery disease	46	FAM30A	3.34344e-05
peripheral artery disease	47	LINC00273	3.34344e-05
peripheral artery disease	48	FMR1-AS1	3.34344e-05
peripheral artery disease	49	LINC01081	3.34344e-05
peripheral artery disease	50	GNG12-AS1	3.34344e-05
tongue squamous cell carcinoma	1	MALAT1	0.999613
tongue squamous cell carcinoma	2	MEG3	0.978301
tongue squamous cell carcinoma	3	UCA1	0.854158
tongue squamous cell carcinoma	4	HOTTIP	0.734772
tongue squamous cell carcinoma	5	GATA3-AS1	0.701897
tongue squamous cell carcinoma	6	PARD6G-AS1	0.699893
tongue squamous cell carcinoma	7	LINC00477	0.699608
tongue squamous cell carcinoma	8	LINC00319	0.699483
tongue squamous cell carcinoma	9	CECR7	0.657207
tongue squamous cell carcinoma	10	GABPB1-AS1	0.599051
tongue squamous cell carcinoma	11	OIP5-AS1	0.324206
tongue squamous cell carcinoma	12	DISC1FP1	0.296956
tongue squamous cell carcinoma	13	CARMN	0.288382
tongue squamous cell carcinoma	14	VLDLR-AS1	0.21645
tongue squamous cell carcinoma	15	PWAR5	0.110631
tongue squamous cell carcinoma	16	LINC00479	0.0157672
tongue squamous cell carcinoma	17	TSIX	0.009725
tongue squamous cell carcinoma	18	HELLPAR	0.00367001
tongue squamous cell carcinoma	19	LINC00575	0.00340317
tongue squamous cell carcinoma	20	LINC00315	0.0028158
tongue squamous cell carcinoma	21	PWRN1	0.00171205
tongue squamous cell carcinoma	22	LINC01184	0.00117444
tongue squamous cell carcinoma	23	TTTY4	0.000861782
tongue squamous cell carcinoma	24	GHRLOS	0.000577863
tongue squamous cell carcinoma	25	MIR22HG	0.000396748
tongue squamous cell carcinoma	26	LINC01235	0.00021997
tongue squamous cell carcinoma	27	FALEC	0.000194571
tongue squamous cell carcinoma	28	B3GALT5-AS1	0.000187602
tongue squamous cell carcinoma	29	GPR1-AS	0.000177993
tongue squamous cell carcinoma	30	XACT	0.000102073
tongue squamous cell carcinoma	31	PARTICL	8.58392e-05
tongue squamous cell carcinoma	32	MIR4435-2HG	8.36926e-05
tongue squamous cell carcinoma	33	MIR181A1HG	8.31265e-05
tongue squamous cell carcinoma	34	PEG3-AS1	6.96903e-05
tongue squamous cell carcinoma	35	COPG2IT1	6.58698e-05
tongue squamous cell carcinoma	36	PCAT4	6.06378e-05
tongue squamous cell carcinoma	37	ADORA2A-AS1	5.82991e-05
tongue squamous cell carcinoma	38	COL18A1-AS1	5.68806e-05
tongue squamous cell carcinoma	39	FMR1-AS1	4.84062e-05
tongue squamous cell carcinoma	40	LINC00293	4.76475e-05
tongue squamous cell carcinoma	41	DIO3OS	4.55194e-05
tongue squamous cell carcinoma	42	OLMALINC	3.05363e-05
tongue squamous cell carcinoma	43	HAS2-AS1	2.83248e-05
tongue squamous cell carcinoma	44	RAD51-AS1	2.7942e-05
tongue squamous cell carcinoma	45	LINC01602	2.5741e-05
tongue squamous cell carcinoma	46	NUP50-AS1	2.36862e-05
tongue squamous cell carcinoma	47	FAM30A	2.0413e-05
tongue squamous cell carcinoma	48	LINC00273	1.9571e-05
tongue squamous cell carcinoma	49	DBET	1.89412e-05
tongue squamous cell carcinoma	50	APTR	1.72164e-05
oral squamous cell carcinoma	1	MEG3	0.982885
oral squamous cell carcinoma	2	CCAT2	0.820552
oral squamous cell carcinoma	3	MALAT1	0.700042
oral squamous cell carcinoma	4	NEAT1	0.699871
oral squamous cell carcinoma	5	HOTAIR	0.689162
oral squamous cell carcinoma	6	GATA3-AS1	0.664666
oral squamous cell carcinoma	7	LINC00477	0.632928
oral squamous cell carcinoma	8	PARD6G-AS1	0.560931
oral squamous cell carcinoma	9	LINC00319	0.499544
oral squamous cell carcinoma	10	CECR7	0.496847
oral squamous cell carcinoma	11	GABPB1-AS1	0.477738
oral squamous cell carcinoma	12	TTTY4	0.446935
oral squamous cell carcinoma	13	CARMN	0.444295
oral squamous cell carcinoma	14	PWAR5	0.361481
oral squamous cell carcinoma	15	LINC00479	0.328947
oral squamous cell carcinoma	16	TSIX	0.326172
oral squamous cell carcinoma	17	PWRN1	0.283142
oral squamous cell carcinoma	18	LINC00315	0.168603
oral squamous cell carcinoma	19	LINC01184	0.162091
oral squamous cell carcinoma	20	GHRLOS	0.129201
oral squamous cell carcinoma	21	MIR22HG	0.125264
oral squamous cell carcinoma	22	HELLPAR	0.0960322
oral squamous cell carcinoma	23	LINC01235	0.0585281
oral squamous cell carcinoma	24	VLDLR-AS1	0.0491243
oral squamous cell carcinoma	25	DISC1FP1	0.0376145
oral squamous cell carcinoma	26	LINC00575	0.0254028
oral squamous cell carcinoma	27	FALEC	0.0200352
oral squamous cell carcinoma	28	B3GALT5-AS1	0.0121286
oral squamous cell carcinoma	29	GPR1-AS	0.0113687
oral squamous cell carcinoma	30	XACT	0.0109136
oral squamous cell carcinoma	31	PARTICL	0.0053278
oral squamous cell carcinoma	32	MIR4435-2HG	0.00314968
oral squamous cell carcinoma	33	MIR181A1HG	0.00214349
oral squamous cell carcinoma	34	PEG3-AS1	0.00208797
oral squamous cell carcinoma	35	COPG2IT1	0.0011387
oral squamous cell carcinoma	36	PCAT4	0.00102824
oral squamous cell carcinoma	37	ADORA2A-AS1	0.000547031
oral squamous cell carcinoma	38	COL18A1-AS1	0.000386036
oral squamous cell carcinoma	39	FMR1-AS1	0.000358969
oral squamous cell carcinoma	40	LINC00293	0.000351409
oral squamous cell carcinoma	41	DIO3OS	0.000334478
oral squamous cell carcinoma	42	OLMALINC	0.00032262
oral squamous cell carcinoma	43	HAS2-AS1	0.000301869
oral squamous cell carcinoma	44	RAD51-AS1	0.00028864
oral squamous cell carcinoma	45	LINC01602	0.000271803
oral squamous cell carcinoma	46	NUP50-AS1	0.000253792
oral squamous cell carcinoma	47	FAM30A	0.000248998
oral squamous cell carcinoma	48	LINC00273	0.000226497
oral squamous cell carcinoma	49	DBET	0.000200054
oral squamous cell carcinoma	50	APTR	0.000158232
IMAGe syndrome	1	H19	0.690973
IMAGe syndrome	2	UCA1	0.680621
IMAGe syndrome	3	GATA3-AS1	0.0164273
IMAGe syndrome	4	LINC00477	0.0080504
IMAGe syndrome	5	PARD6G-AS1	0.0062018
IMAGe syndrome	6	LINC00319	0.00499627
IMAGe syndrome	7	CECR7	0.00467918
IMAGe syndrome	8	GABPB1-AS1	0.00433174
IMAGe syndrome	9	B3GALT5-AS1	0.00248832
IMAGe syndrome	10	TTTY4	0.00141226
IMAGe syndrome	11	CARMN	0.00135078
IMAGe syndrome	12	PWAR5	0.000761053
IMAGe syndrome	13	LINC00479	0.000754806
IMAGe syndrome	14	TSIX	0.000694308
IMAGe syndrome	15	LINC00575	0.000610253
IMAGe syndrome	16	LINC01184	0.000610253
IMAGe syndrome	17	PWRN1	0.000610253
IMAGe syndrome	18	GHRLOS	0.000610253
IMAGe syndrome	19	MIR22HG	0.000610253
IMAGe syndrome	20	HELLPAR	0.000610253
IMAGe syndrome	21	LINC01235	0.000474988
IMAGe syndrome	22	VLDLR-AS1	0.000426798
IMAGe syndrome	23	DISC1FP1	0.000425722
IMAGe syndrome	24	DBET	0.000364431
IMAGe syndrome	25	LINC00315	0.000345342
IMAGe syndrome	26	FALEC	0.000327526
IMAGe syndrome	27	GPR1-AS	0.000257384
IMAGe syndrome	28	LRRC3DN	0.000250797
IMAGe syndrome	29	XACT	0.000220925
IMAGe syndrome	30	PARTICL	0.000217065
IMAGe syndrome	31	MIR4435-2HG	0.000200421
IMAGe syndrome	32	MIR181A1HG	0.0001843
IMAGe syndrome	33	PEG3-AS1	0.000175721
IMAGe syndrome	34	COPG2IT1	0.000160614
IMAGe syndrome	35	PCAT4	0.000145621
IMAGe syndrome	36	ADORA2A-AS1	0.000145621
IMAGe syndrome	37	COL18A1-AS1	0.000145621
IMAGe syndrome	38	LINC00293	0.000145621
IMAGe syndrome	39	APTR	0.000145621
IMAGe syndrome	40	DIO3OS	0.000145621
IMAGe syndrome	41	OLMALINC	0.000145621
IMAGe syndrome	42	HAS2-AS1	0.000145621
IMAGe syndrome	43	RAD51-AS1	0.000145621
IMAGe syndrome	44	LINC01602	0.000145621
IMAGe syndrome	45	NUP50-AS1	0.000145621
IMAGe syndrome	46	FAM30A	0.000145621
IMAGe syndrome	47	LINC00273	0.000145621
IMAGe syndrome	48	FMR1-AS1	0.000134341
IMAGe syndrome	49	LINC01081	0.00012987
IMAGe syndrome	50	GNG12-AS1	0.000120706
synucleinopathy	1	XIST	0.716424
synucleinopathy	2	PARD6G-AS1	0.700598
synucleinopathy	3	GATA3-AS1	0.700065
synucleinopathy	4	LINC00477	0.642344
synucleinopathy	5	LINC00319	0.218729
synucleinopathy	6	CECR7	0.00323778
synucleinopathy	7	GABPB1-AS1	0.0030643
synucleinopathy	8	MEG8	0.00217363
synucleinopathy	9	TTTY4	0.00151748
synucleinopathy	10	CARMN	0.00127744
synucleinopathy	11	PWAR5	0.000251477
synucleinopathy	12	LINC00479	0.000231842
synucleinopathy	13	TSIX	0.000208297
synucleinopathy	14	LINC00575	0.000204129
synucleinopathy	15	B3GALT5-AS1	0.000173901
synucleinopathy	16	PWRN1	0.000159618
synucleinopathy	17	LINC01184	7.75018e-05
synucleinopathy	18	GHRLOS	7.51794e-05
synucleinopathy	19	MIR22HG	6.69397e-05
synucleinopathy	20	HELLPAR	5.23579e-05
synucleinopathy	21	LINC01235	5.12474e-05
synucleinopathy	22	VLDLR-AS1	4.68275e-05
synucleinopathy	23	DISC1FP1	4.61035e-05
synucleinopathy	24	DBET	4.58144e-05
synucleinopathy	25	LINC00315	4.32086e-05
synucleinopathy	26	FALEC	4.12564e-05
synucleinopathy	27	GPR1-AS	3.76661e-05
synucleinopathy	28	LRRC3DN	3.54437e-05
synucleinopathy	29	XACT	2.75306e-05
synucleinopathy	30	PARTICL	2.6302e-05
synucleinopathy	31	MIR4435-2HG	2.3348e-05
synucleinopathy	32	MIR181A1HG	2.20804e-05
synucleinopathy	33	PEG3-AS1	1.9954e-05
synucleinopathy	34	COPG2IT1	1.71933e-05
synucleinopathy	35	PCAT4	1.66033e-05
synucleinopathy	36	ADORA2A-AS1	1.64022e-05
synucleinopathy	37	COL18A1-AS1	1.54272e-05
synucleinopathy	38	LINC00293	1.41801e-05
synucleinopathy	39	APTR	1.41248e-05
synucleinopathy	40	DIO3OS	1.32033e-05
synucleinopathy	41	OLMALINC	1.2905e-05
synucleinopathy	42	HAS2-AS1	1.12398e-05
synucleinopathy	43	RAD51-AS1	1.10949e-05
synucleinopathy	44	LINC01602	1.08875e-05
synucleinopathy	45	NUP50-AS1	1.06679e-05
synucleinopathy	46	FAM30A	9.17707e-06
synucleinopathy	47	LINC00273	9.10473e-06
synucleinopathy	48	FMR1-AS1	8.72091e-06
synucleinopathy	49	LINC01081	8.55843e-06
synucleinopathy	50	GNG12-AS1	8.3291e-06
medulloblastoma	1	H19	0.955529
medulloblastoma	2	MIR17HG	0.699982
medulloblastoma	3	OIP5-AS1	0.698164
medulloblastoma	4	GATA3-AS1	0.579144
medulloblastoma	5	LINC00477	0.521819
medulloblastoma	6	PARD6G-AS1	0.434347
medulloblastoma	7	LINC00319	0.304546
medulloblastoma	8	CECR7	0.254871
medulloblastoma	9	GABPB1-AS1	0.125186
medulloblastoma	10	MEG8	0.0769119
medulloblastoma	11	CARMN	0.0766296
medulloblastoma	12	PWAR5	0.0229806
medulloblastoma	13	LINC00479	0.0106702
medulloblastoma	14	TSIX	0.00386103
medulloblastoma	15	LINC00575	0.00238378
medulloblastoma	16	LINC01184	0.00117218
medulloblastoma	17	PWRN1	0.00090833
medulloblastoma	18	GHRLOS	0.000864238
medulloblastoma	19	MIR22HG	0.000853844
medulloblastoma	20	HELLPAR	0.000473214
medulloblastoma	21	LINC01235	0.000407691
medulloblastoma	22	VLDLR-AS1	0.00036817
medulloblastoma	23	DISC1FP1	0.000201509
medulloblastoma	24	DBET	0.000187952
medulloblastoma	25	LINC00315	0.000175751
medulloblastoma	26	TTTY4	0.00014103
medulloblastoma	27	B3GALT5-AS1	0.000138681
medulloblastoma	28	GPR1-AS	0.000127151
medulloblastoma	29	XACT	0.000115119
medulloblastoma	30	PARTICL	0.000110907
medulloblastoma	31	MIR4435-2HG	8.80264e-05
medulloblastoma	32	MIR181A1HG	8.28448e-05
medulloblastoma	33	PEG3-AS1	8.05733e-05
medulloblastoma	34	COPG2IT1	7.31274e-05
medulloblastoma	35	PCAT4	7.0586e-05
medulloblastoma	36	ADORA2A-AS1	7.0586e-05
medulloblastoma	37	COL18A1-AS1	7.0586e-05
medulloblastoma	38	FALEC	7.0586e-05
medulloblastoma	39	LINC00293	7.0586e-05
medulloblastoma	40	DIO3OS	7.0586e-05
medulloblastoma	41	OLMALINC	6.71417e-05
medulloblastoma	42	HAS2-AS1	6.34566e-05
medulloblastoma	43	RAD51-AS1	6.30872e-05
medulloblastoma	44	LINC01602	6.03057e-05
medulloblastoma	45	NUP50-AS1	5.94177e-05
medulloblastoma	46	FAM30A	5.87576e-05
medulloblastoma	47	LINC00273	5.27795e-05
medulloblastoma	48	LRRC3DN	5.23512e-05
medulloblastoma	49	APTR	5.07232e-05
medulloblastoma	50	FMR1-AS1	4.99846e-05
myelodysplastic syndrome	1	MEG3	0.999988
myelodysplastic syndrome	2	SNHG4	0.99862
myelodysplastic syndrome	3	GATA3-AS1	0.996522
myelodysplastic syndrome	4	LINC00477	0.877568
myelodysplastic syndrome	5	PARD6G-AS1	0.704338
myelodysplastic syndrome	6	LINC00319	0.699947
myelodysplastic syndrome	7	CECR7	0.699925
myelodysplastic syndrome	8	GABPB1-AS1	0.699821
myelodysplastic syndrome	9	B3GALT5-AS1	0.699172
myelodysplastic syndrome	10	TTTY4	0.687151
myelodysplastic syndrome	11	CARMN	0.683146
myelodysplastic syndrome	12	PWAR5	0.673485
myelodysplastic syndrome	13	LINC00479	0.663048
myelodysplastic syndrome	14	TSIX	0.574655
myelodysplastic syndrome	15	LINC00575	0.493568
myelodysplastic syndrome	16	LINC01184	0.432182
myelodysplastic syndrome	17	PWRN1	0.1531
myelodysplastic syndrome	18	GHRLOS	0.152682
myelodysplastic syndrome	19	MIR22HG	0.134788
myelodysplastic syndrome	20	HELLPAR	0.12558
myelodysplastic syndrome	21	LINC01235	0.122774
myelodysplastic syndrome	22	VLDLR-AS1	0.083272
myelodysplastic syndrome	23	DISC1FP1	0.0806089
myelodysplastic syndrome	24	DBET	0.0408104
myelodysplastic syndrome	25	LINC00315	0.0234421
myelodysplastic syndrome	26	FALEC	0.00828411
myelodysplastic syndrome	27	GPR1-AS	0.00645303
myelodysplastic syndrome	28	LRRC3DN	0.00474528
myelodysplastic syndrome	29	XACT	0.00472488
myelodysplastic syndrome	30	PARTICL	0.00451963
myelodysplastic syndrome	31	MIR4435-2HG	0.00439436
myelodysplastic syndrome	32	MIR181A1HG	0.00275108
myelodysplastic syndrome	33	PEG3-AS1	0.00206353
myelodysplastic syndrome	34	COPG2IT1	0.00190105
myelodysplastic syndrome	35	PCAT4	0.00161714
myelodysplastic syndrome	36	ADORA2A-AS1	0.00152772
myelodysplastic syndrome	37	COL18A1-AS1	0.00137184
myelodysplastic syndrome	38	LINC00293	0.000833208
myelodysplastic syndrome	39	APTR	0.000756731
myelodysplastic syndrome	40	DIO3OS	0.000701549
myelodysplastic syndrome	41	OLMALINC	0.000520635
myelodysplastic syndrome	42	HAS2-AS1	0.000289074
myelodysplastic syndrome	43	RAD51-AS1	0.000260591
myelodysplastic syndrome	44	LINC01602	0.000218115
myelodysplastic syndrome	45	NUP50-AS1	0.000111565
myelodysplastic syndrome	46	FAM30A	9.87682e-05
myelodysplastic syndrome	47	LINC00273	8.06112e-05
myelodysplastic syndrome	48	FMR1-AS1	4.57442e-05
myelodysplastic syndrome	49	LINC01081	3.94798e-05
myelodysplastic syndrome	50	GNG12-AS1	2.33911e-05
hereditary ataxia	1	ATXN8OS	0.799651
hereditary ataxia	2	PARD6G-AS1	0.693972
hereditary ataxia	3	GATA3-AS1	0.688472
hereditary ataxia	4	LINC00477	0.0190116
hereditary ataxia	5	CECR7	0.0111391
hereditary ataxia	6	LINC00319	0.00521997
hereditary ataxia	7	GABPB1-AS1	0.00205048
hereditary ataxia	8	MEG8	0.000645724
hereditary ataxia	9	TTTY4	0.000123135
hereditary ataxia	10	CARMN	0.000103033
hereditary ataxia	11	PWAR5	0.000101887
hereditary ataxia	12	LINC00479	8.07163e-05
hereditary ataxia	13	TSIX	7.28828e-05
hereditary ataxia	14	LINC00575	6.79663e-05
hereditary ataxia	15	B3GALT5-AS1	6.11259e-05
hereditary ataxia	16	PWRN1	5.60951e-05
hereditary ataxia	17	LINC01184	2.26048e-05
hereditary ataxia	18	GHRLOS	2.2532e-05
hereditary ataxia	19	MIR22HG	1.11588e-05
hereditary ataxia	20	HELLPAR	1.08719e-05
hereditary ataxia	21	LINC01235	7.44648e-06
hereditary ataxia	22	VLDLR-AS1	7.2451e-06
hereditary ataxia	23	DISC1FP1	4.84175e-06
hereditary ataxia	24	DBET	4.52075e-06
hereditary ataxia	25	LINC00315	3.10551e-06
hereditary ataxia	26	FALEC	2.97876e-06
hereditary ataxia	27	GPR1-AS	2.74548e-06
hereditary ataxia	28	LRRC3DN	1.45778e-06
hereditary ataxia	29	XACT	1.31018e-06
hereditary ataxia	30	PARTICL	1.22852e-06
hereditary ataxia	31	MIR4435-2HG	1.16734e-06
hereditary ataxia	32	MIR181A1HG	1.16561e-06
hereditary ataxia	33	PEG3-AS1	1.16143e-06
hereditary ataxia	34	COPG2IT1	1.16143e-06
hereditary ataxia	35	PCAT4	1.16143e-06
hereditary ataxia	36	ADORA2A-AS1	1.16143e-06
hereditary ataxia	37	COL18A1-AS1	1.16143e-06
hereditary ataxia	38	LINC00293	1.16143e-06
hereditary ataxia	39	APTR	1.0575e-06
hereditary ataxia	40	DIO3OS	8.68693e-07
hereditary ataxia	41	OLMALINC	7.1709e-07
hereditary ataxia	42	HAS2-AS1	6.38467e-07
hereditary ataxia	43	RAD51-AS1	6.24854e-07
hereditary ataxia	44	LINC01602	6.14793e-07
hereditary ataxia	45	NUP50-AS1	5.77323e-07
hereditary ataxia	46	FAM30A	4.96293e-07
hereditary ataxia	47	LINC00273	4.37056e-07
hereditary ataxia	48	FMR1-AS1	4.19995e-07
hereditary ataxia	49	LINC01081	4.07832e-07
hereditary ataxia	50	GNG12-AS1	4.05521e-07
spinocerebellar ataxia type 8	1	GATA3-AS1	0.701369
spinocerebellar ataxia type 8	2	LINC00477	0.697044
spinocerebellar ataxia type 8	3	PARD6G-AS1	0.13028
spinocerebellar ataxia type 8	4	CECR7	0.0351358
spinocerebellar ataxia type 8	5	LINC00319	0.0259107
spinocerebellar ataxia type 8	6	GABPB1-AS1	0.00559033
spinocerebellar ataxia type 8	7	MEG8	0.0046924
spinocerebellar ataxia type 8	8	B3GALT5-AS1	0.000843539
spinocerebellar ataxia type 8	9	TTTY4	0.000342765
spinocerebellar ataxia type 8	10	CARMN	0.000151028
spinocerebellar ataxia type 8	11	PWAR5	0.000120484
spinocerebellar ataxia type 8	12	LINC00479	7.6146e-05
spinocerebellar ataxia type 8	13	TSIX	7.08368e-05
spinocerebellar ataxia type 8	14	LINC00575	6.93903e-05
spinocerebellar ataxia type 8	15	LINC01184	6.80859e-05
spinocerebellar ataxia type 8	16	PWRN1	4.93005e-05
spinocerebellar ataxia type 8	17	GHRLOS	2.77995e-05
spinocerebellar ataxia type 8	18	MIR22HG	2.54699e-05
spinocerebellar ataxia type 8	19	HELLPAR	2.21721e-05
spinocerebellar ataxia type 8	20	LINC01235	2.18426e-05
spinocerebellar ataxia type 8	21	VLDLR-AS1	2.08478e-05
spinocerebellar ataxia type 8	22	DISC1FP1	1.91356e-05
spinocerebellar ataxia type 8	23	DBET	1.87057e-05
spinocerebellar ataxia type 8	24	LINC00315	1.84339e-05
spinocerebellar ataxia type 8	25	FALEC	1.76846e-05
spinocerebellar ataxia type 8	26	GPR1-AS	1.7456e-05
spinocerebellar ataxia type 8	27	LRRC3DN	1.23197e-05
spinocerebellar ataxia type 8	28	XACT	1.04133e-05
spinocerebellar ataxia type 8	29	PARTICL	1.02088e-05
spinocerebellar ataxia type 8	30	MIR4435-2HG	9.88485e-06
spinocerebellar ataxia type 8	31	MIR181A1HG	9.61913e-06
spinocerebellar ataxia type 8	32	PEG3-AS1	8.13832e-06
spinocerebellar ataxia type 8	33	COPG2IT1	7.90189e-06
spinocerebellar ataxia type 8	34	PCAT4	7.60504e-06
spinocerebellar ataxia type 8	35	ADORA2A-AS1	7.03802e-06
spinocerebellar ataxia type 8	36	COL18A1-AS1	6.82692e-06
spinocerebellar ataxia type 8	37	LINC00293	6.51881e-06
spinocerebellar ataxia type 8	38	APTR	6.44224e-06
spinocerebellar ataxia type 8	39	DIO3OS	5.84619e-06
spinocerebellar ataxia type 8	40	OLMALINC	5.75844e-06
spinocerebellar ataxia type 8	41	HAS2-AS1	5.73071e-06
spinocerebellar ataxia type 8	42	RAD51-AS1	4.91576e-06
spinocerebellar ataxia type 8	43	LINC01602	4.6024e-06
spinocerebellar ataxia type 8	44	NUP50-AS1	4.47405e-06
spinocerebellar ataxia type 8	45	FAM30A	4.47405e-06
spinocerebellar ataxia type 8	46	LINC00273	4.47405e-06
spinocerebellar ataxia type 8	47	FMR1-AS1	4.47405e-06
spinocerebellar ataxia type 8	48	LINC01081	4.47405e-06
spinocerebellar ataxia type 8	49	GNG12-AS1	4.47405e-06
spinocerebellar ataxia type 8	50	TTTY2	4.4072e-06
developmental disorder of mental health	1	TP53TG1	0.699758
developmental disorder of mental health	2	LINC00299	0.692987
developmental disorder of mental health	3	OIP5-AS1	0.681062
developmental disorder of mental health	4	GATA3-AS1	0.301496
developmental disorder of mental health	5	LINC00477	0.3004
developmental disorder of mental health	6	PARD6G-AS1	0.16887
developmental disorder of mental health	7	LINC00319	0.125203
developmental disorder of mental health	8	CECR7	0.101813
developmental disorder of mental health	9	HULC	0.0349504
developmental disorder of mental health	10	GABPB1-AS1	0.0330007
developmental disorder of mental health	11	MEG8	0.0242354
developmental disorder of mental health	12	CARMN	0.0238839
developmental disorder of mental health	13	PWAR5	0.0201085
developmental disorder of mental health	14	LINC00479	0.0139976
developmental disorder of mental health	15	TSIX	0.00780816
developmental disorder of mental health	16	LINC00575	0.00575363
developmental disorder of mental health	17	LINC01184	0.00538693
developmental disorder of mental health	18	PWRN1	0.00535326
developmental disorder of mental health	19	TTTY4	0.00376036
developmental disorder of mental health	20	GHRLOS	0.0035148
developmental disorder of mental health	21	MIR22HG	0.00331533
developmental disorder of mental health	22	HELLPAR	0.00208751
developmental disorder of mental health	23	LINC01235	0.00151862
developmental disorder of mental health	24	VLDLR-AS1	0.00110038
developmental disorder of mental health	25	DISC1FP1	0.000925365
developmental disorder of mental health	26	LINC00315	0.000665335
developmental disorder of mental health	27	FALEC	0.000437704
developmental disorder of mental health	28	B3GALT5-AS1	0.00037318
developmental disorder of mental health	29	GPR1-AS	0.000296126
developmental disorder of mental health	30	XACT	0.000270287
developmental disorder of mental health	31	PARTICL	0.000210667
developmental disorder of mental health	32	MIR4435-2HG	0.000202026
developmental disorder of mental health	33	MIR181A1HG	0.000179757
developmental disorder of mental health	34	PEG3-AS1	0.000145491
developmental disorder of mental health	35	COPG2IT1	0.000129694
developmental disorder of mental health	36	PCAT4	0.000117993
developmental disorder of mental health	37	ADORA2A-AS1	0.000106853
developmental disorder of mental health	38	COL18A1-AS1	0.000104504
developmental disorder of mental health	39	FMR1-AS1	8.70064e-05
developmental disorder of mental health	40	LINC00293	8.54671e-05
developmental disorder of mental health	41	DIO3OS	8.54671e-05
developmental disorder of mental health	42	OLMALINC	8.54671e-05
developmental disorder of mental health	43	HAS2-AS1	8.54671e-05
developmental disorder of mental health	44	RAD51-AS1	8.54671e-05
developmental disorder of mental health	45	LINC01602	8.54671e-05
developmental disorder of mental health	46	NUP50-AS1	8.12535e-05
developmental disorder of mental health	47	FAM30A	7.30451e-05
developmental disorder of mental health	48	LINC00273	7.06808e-05
developmental disorder of mental health	49	DBET	6.18766e-05
developmental disorder of mental health	50	APTR	6.13034e-05
specific developmental disorder	1	TP53TG1	0.988924
specific developmental disorder	2	LINC00299	0.178811
specific developmental disorder	3	GATA3-AS1	0.0387066
specific developmental disorder	4	LINC00477	0.0197701
specific developmental disorder	5	PARD6G-AS1	0.0054963
specific developmental disorder	6	LINC00319	0.00361252
specific developmental disorder	7	CECR7	0.0033704
specific developmental disorder	8	MEG8	0.00230857
specific developmental disorder	9	UCA1	0.000840966
specific developmental disorder	10	GABPB1-AS1	0.000732883
specific developmental disorder	11	TTTY4	0.000617482
specific developmental disorder	12	CARMN	0.000447151
specific developmental disorder	13	PWAR5	0.000347822
specific developmental disorder	14	LINC00479	0.000192526
specific developmental disorder	15	TSIX	0.000119721
specific developmental disorder	16	LINC00575	0.00011921
specific developmental disorder	17	PWRN1	0.00011277
specific developmental disorder	18	FALEC	6.20674e-05
specific developmental disorder	19	LINC01184	5.04861e-05
specific developmental disorder	20	GHRLOS	3.76343e-05
specific developmental disorder	21	MIR22HG	3.39847e-05
specific developmental disorder	22	HELLPAR	2.92915e-05
specific developmental disorder	23	LINC01235	2.29737e-05
specific developmental disorder	24	VLDLR-AS1	2.28417e-05
specific developmental disorder	25	DISC1FP1	1.92551e-05
specific developmental disorder	26	LINC00315	1.90572e-05
specific developmental disorder	27	FMR1-AS1	1.43769e-05
specific developmental disorder	28	B3GALT5-AS1	1.39545e-05
specific developmental disorder	29	LRRC3DN	1.39545e-05
specific developmental disorder	30	XACT	1.39545e-05
specific developmental disorder	31	PARTICL	1.39545e-05
specific developmental disorder	32	MIR4435-2HG	1.39545e-05
specific developmental disorder	33	MIR181A1HG	1.39545e-05
specific developmental disorder	34	PEG3-AS1	1.33835e-05
specific developmental disorder	35	COPG2IT1	1.33111e-05
specific developmental disorder	36	PCAT4	1.16088e-05
specific developmental disorder	37	ADORA2A-AS1	1.06567e-05
specific developmental disorder	38	COL18A1-AS1	9.97982e-06
specific developmental disorder	39	LINC00293	9.10086e-06
specific developmental disorder	40	APTR	8.41053e-06
specific developmental disorder	41	DIO3OS	6.92987e-06
specific developmental disorder	42	OLMALINC	6.25255e-06
specific developmental disorder	43	HAS2-AS1	5.46213e-06
specific developmental disorder	44	RAD51-AS1	5.08511e-06
specific developmental disorder	45	LINC01602	4.81519e-06
specific developmental disorder	46	NUP50-AS1	4.74004e-06
specific developmental disorder	47	FAM30A	4.61955e-06
specific developmental disorder	48	DBET	4.15266e-06
specific developmental disorder	49	GPR1-AS	4.12017e-06
specific developmental disorder	50	LINC00273	3.74162e-06
pervasive developmental disorder	1	DISC2	0.74989
pervasive developmental disorder	2	PARD6G-AS1	0.700021
pervasive developmental disorder	3	GATA3-AS1	0.69969
pervasive developmental disorder	4	LINC00477	0.699068
pervasive developmental disorder	5	LINC00319	0.697989
pervasive developmental disorder	6	CECR7	0.694673
pervasive developmental disorder	7	MEG8	0.617075
pervasive developmental disorder	8	GABPB1-AS1	0.504204
pervasive developmental disorder	9	TTTY4	0.227167
pervasive developmental disorder	10	CARMN	0.226252
pervasive developmental disorder	11	PWAR5	0.0738436
pervasive developmental disorder	12	LINC00479	0.0735113
pervasive developmental disorder	13	TSIX	0.0722821
pervasive developmental disorder	14	LINC00575	0.0588064
pervasive developmental disorder	15	LINC00315	0.0208658
pervasive developmental disorder	16	B3GALT5-AS1	0.00817191
pervasive developmental disorder	17	LINC01184	0.0041965
pervasive developmental disorder	18	GHRLOS	0.00417728
pervasive developmental disorder	19	MIR22HG	0.00177815
pervasive developmental disorder	20	HELLPAR	0.00140373
pervasive developmental disorder	21	LINC01235	0.000813187
pervasive developmental disorder	22	VLDLR-AS1	0.000728088
pervasive developmental disorder	23	DISC1FP1	0.000702386
pervasive developmental disorder	24	DBET	0.000585416
pervasive developmental disorder	25	PWRN1	0.000403743
pervasive developmental disorder	26	FALEC	0.000283538
pervasive developmental disorder	27	GPR1-AS	0.000221737
pervasive developmental disorder	28	LRRC3DN	0.000182445
pervasive developmental disorder	29	XACT	6.35466e-05
pervasive developmental disorder	30	PARTICL	4.99016e-05
pervasive developmental disorder	31	MIR4435-2HG	3.97113e-05
pervasive developmental disorder	32	MIR181A1HG	2.18496e-05
pervasive developmental disorder	33	PEG3-AS1	1.51602e-05
pervasive developmental disorder	34	COPG2IT1	1.36509e-05
pervasive developmental disorder	35	PCAT4	9.71152e-06
pervasive developmental disorder	36	ADORA2A-AS1	6.9305e-06
pervasive developmental disorder	37	COL18A1-AS1	5.85652e-06
pervasive developmental disorder	38	LINC00293	5.53327e-06
pervasive developmental disorder	39	APTR	5.22006e-06
pervasive developmental disorder	40	DIO3OS	4.71671e-06
pervasive developmental disorder	41	OLMALINC	2.94249e-06
pervasive developmental disorder	42	HAS2-AS1	2.59816e-06
pervasive developmental disorder	43	RAD51-AS1	2.10638e-06
pervasive developmental disorder	44	LINC01602	1.9727e-06
pervasive developmental disorder	45	NUP50-AS1	1.76263e-06
pervasive developmental disorder	46	FAM30A	1.74377e-06
pervasive developmental disorder	47	LINC00273	1.63388e-06
pervasive developmental disorder	48	FMR1-AS1	1.58818e-06
pervasive developmental disorder	49	LINC01081	1.56214e-06
pervasive developmental disorder	50	GNG12-AS1	1.33657e-06
autism spectrum disorder	1	DISC2	0.935023
autism spectrum disorder	2	MEG8	0.699996
autism spectrum disorder	3	GATA3-AS1	0.699928
autism spectrum disorder	4	LINC00477	0.699625
autism spectrum disorder	5	PARD6G-AS1	0.699404
autism spectrum disorder	6	LINC00319	0.682064
autism spectrum disorder	7	OIP5-AS1	0.656829
autism spectrum disorder	8	CECR7	0.643547
autism spectrum disorder	9	HAND2-AS1	0.299812
autism spectrum disorder	10	GABPB1-AS1	0.286884
autism spectrum disorder	11	CARMN	0.285258
autism spectrum disorder	12	PWAR5	0.220388
autism spectrum disorder	13	LINC00479	0.190743
autism spectrum disorder	14	TSIX	0.153051
autism spectrum disorder	15	LINC00575	0.0750599
autism spectrum disorder	16	PWRN1	0.0223741
autism spectrum disorder	17	TTTY4	0.00989016
autism spectrum disorder	18	LINC01184	0.0070299
autism spectrum disorder	19	GHRLOS	0.00519481
autism spectrum disorder	20	MIR22HG	0.00466854
autism spectrum disorder	21	HELLPAR	0.00365164
autism spectrum disorder	22	LINC01235	0.00335374
autism spectrum disorder	23	VLDLR-AS1	0.00286878
autism spectrum disorder	24	DISC1FP1	0.00241697
autism spectrum disorder	25	LINC00315	0.00232777
autism spectrum disorder	26	FALEC	0.00156327
autism spectrum disorder	27	B3GALT5-AS1	0.000945418
autism spectrum disorder	28	GPR1-AS	0.000920424
autism spectrum disorder	29	XACT	0.000581249
autism spectrum disorder	30	PARTICL	0.000388778
autism spectrum disorder	31	MIR4435-2HG	0.000301569
autism spectrum disorder	32	MIR181A1HG	0.000203516
autism spectrum disorder	33	PEG3-AS1	6.73771e-05
autism spectrum disorder	34	COPG2IT1	2.82683e-05
autism spectrum disorder	35	PCAT4	2.76431e-05
autism spectrum disorder	36	ADORA2A-AS1	2.67643e-05
autism spectrum disorder	37	COL18A1-AS1	2.64316e-05
autism spectrum disorder	38	FMR1-AS1	2.01783e-05
autism spectrum disorder	39	LINC00293	1.90031e-05
autism spectrum disorder	40	DIO3OS	1.65282e-05
autism spectrum disorder	41	OLMALINC	1.26971e-05
autism spectrum disorder	42	HAS2-AS1	7.4302e-06
autism spectrum disorder	43	RAD51-AS1	7.25826e-06
autism spectrum disorder	44	LINC01602	5.6693e-06
autism spectrum disorder	45	NUP50-AS1	5.04119e-06
autism spectrum disorder	46	FAM30A	4.13028e-06
autism spectrum disorder	47	LINC00273	4.04434e-06
autism spectrum disorder	48	DBET	3.8674e-06
autism spectrum disorder	49	APTR	3.42087e-06
autism spectrum disorder	50	LRRC3DN	3.25027e-06
hypersensitivity reaction disease	1	PARD6G-AS1	0.889851
hypersensitivity reaction disease	2	GATA3-AS1	0.379122
hypersensitivity reaction disease	3	LINC00477	0.351011
hypersensitivity reaction disease	4	LINC00319	0.107505
hypersensitivity reaction disease	5	CECR7	0.0200497
hypersensitivity reaction disease	6	OIP5-AS1	0.00352044
hypersensitivity reaction disease	7	GABPB1-AS1	0.00291055
hypersensitivity reaction disease	8	MEG8	0.00189639
hypersensitivity reaction disease	9	LINC01235	0.00151808
hypersensitivity reaction disease	10	CARMN	0.000856613
hypersensitivity reaction disease	11	DBET	0.000468556
hypersensitivity reaction disease	12	PWAR5	0.000400449
hypersensitivity reaction disease	13	LINC00479	0.000238698
hypersensitivity reaction disease	14	TSIX	0.000165801
hypersensitivity reaction disease	15	LINC00575	0.00012482
hypersensitivity reaction disease	16	LINC00315	6.014e-05
hypersensitivity reaction disease	17	PWRN1	5.80525e-05
hypersensitivity reaction disease	18	LINC01184	4.91925e-05
hypersensitivity reaction disease	19	TTTY4	4.09161e-05
hypersensitivity reaction disease	20	GHRLOS	3.13455e-05
hypersensitivity reaction disease	21	MIR22HG	2.95394e-05
hypersensitivity reaction disease	22	HELLPAR	2.75497e-05
hypersensitivity reaction disease	23	DISC1FP1	2.74549e-05
hypersensitivity reaction disease	24	VLDLR-AS1	2.69968e-05
hypersensitivity reaction disease	25	B3GALT5-AS1	2.66977e-05
hypersensitivity reaction disease	26	FMR1-AS1	2.66224e-05
hypersensitivity reaction disease	27	GPR1-AS	2.42421e-05
hypersensitivity reaction disease	28	XACT	2.27406e-05
hypersensitivity reaction disease	29	PARTICL	2.09421e-05
hypersensitivity reaction disease	30	MIR4435-2HG	1.97659e-05
hypersensitivity reaction disease	31	MIR181A1HG	1.78339e-05
hypersensitivity reaction disease	32	PEG3-AS1	1.78268e-05
hypersensitivity reaction disease	33	COPG2IT1	1.65735e-05
hypersensitivity reaction disease	34	PCAT4	1.64803e-05
hypersensitivity reaction disease	35	ADORA2A-AS1	1.61492e-05
hypersensitivity reaction disease	36	COL18A1-AS1	1.50311e-05
hypersensitivity reaction disease	37	FALEC	1.26797e-05
hypersensitivity reaction disease	38	LINC00293	1.1874e-05
hypersensitivity reaction disease	39	DIO3OS	1.03321e-05
hypersensitivity reaction disease	40	OLMALINC	1.00041e-05
hypersensitivity reaction disease	41	HAS2-AS1	9.67644e-06
hypersensitivity reaction disease	42	RAD51-AS1	9.27166e-06
hypersensitivity reaction disease	43	LINC01602	8.84564e-06
hypersensitivity reaction disease	44	NUP50-AS1	8.53052e-06
hypersensitivity reaction disease	45	FAM30A	7.69343e-06
hypersensitivity reaction disease	46	LINC00273	7.36039e-06
hypersensitivity reaction disease	47	LRRC3DN	7.20307e-06
hypersensitivity reaction disease	48	APTR	7.09459e-06
hypersensitivity reaction disease	49	LINC01081	6.13558e-06
hypersensitivity reaction disease	50	GNG12-AS1	5.80258e-06
lymphoma	1	HOTAIR	0.999918
lymphoma	2	DLEU2	0.999486
lymphoma	3	TUG1	0.995004
lymphoma	4	MALAT1	0.991663
lymphoma	5	MIR155HG	0.960505
lymphoma	6	GAS5	0.924261
lymphoma	7	OIP5-AS1	0.878418
lymphoma	8	PARD6G-AS1	0.667549
lymphoma	9	GATA3-AS1	0.385104
lymphoma	10	LINC00477	0.264683
lymphoma	11	LINC00319	0.140679
lymphoma	12	CECR7	0.100435
lymphoma	13	MEG8	0.0984207
lymphoma	14	GABPB1-AS1	0.0949779
lymphoma	15	CARMN	0.0710679
lymphoma	16	PWAR5	0.0603796
lymphoma	17	LINC00479	0.0323813
lymphoma	18	TSIX	0.0295655
lymphoma	19	LINC01235	0.0273948
lymphoma	20	GHRLOS	0.0219889
lymphoma	21	HELLPAR	0.0190392
lymphoma	22	LINC00315	0.0159298
lymphoma	23	VLDLR-AS1	0.0146654
lymphoma	24	PWRN1	0.0117388
lymphoma	25	TTTY4	0.0112023
lymphoma	26	LINC01184	0.0104278
lymphoma	27	DISC1FP1	0.00795477
lymphoma	28	MIR22HG	0.00553771
lymphoma	29	LINC00575	0.00537046
lymphoma	30	B3GALT5-AS1	0.00460147
lymphoma	31	FMR1-AS1	0.00374067
lymphoma	32	XACT	0.00339561
lymphoma	33	PARTICL	0.00317254
lymphoma	34	MIR4435-2HG	0.00314286
lymphoma	35	MIR181A1HG	0.00309415
lymphoma	36	PEG3-AS1	0.00293768
lymphoma	37	COPG2IT1	0.00275603
lymphoma	38	PCAT4	0.0027416
lymphoma	39	ADORA2A-AS1	0.0026519
lymphoma	40	COL18A1-AS1	0.0019877
lymphoma	41	LINC00293	0.0018545
lymphoma	42	APTR	0.00164366
lymphoma	43	DIO3OS	0.00114402
lymphoma	44	OLMALINC	0.00104093
lymphoma	45	HAS2-AS1	0.000961423
lymphoma	46	RAD51-AS1	0.000869859
lymphoma	47	LINC01602	0.000838106
lymphoma	48	NUP50-AS1	0.000802044
lymphoma	49	FAM30A	0.000660155
lymphoma	50	LINC00273	0.000626906
non-Hodgkin lymphoma	1	MIR17HG	0.99248
non-Hodgkin lymphoma	2	GAS5	0.989484
non-Hodgkin lymphoma	3	PVT1	0.984124
non-Hodgkin lymphoma	4	TUG1	0.919771
non-Hodgkin lymphoma	5	HOTAIR	0.700227
non-Hodgkin lymphoma	6	MIR155HG	0.696774
non-Hodgkin lymphoma	7	MALAT1	0.494904
non-Hodgkin lymphoma	8	GATA3-AS1	0.490808
non-Hodgkin lymphoma	9	LINC00477	0.417662
non-Hodgkin lymphoma	10	PARD6G-AS1	0.329732
non-Hodgkin lymphoma	11	LINC00319	0.270579
non-Hodgkin lymphoma	12	CECR7	0.196383
non-Hodgkin lymphoma	13	GABPB1-AS1	0.121973
non-Hodgkin lymphoma	14	MEG8	0.102222
non-Hodgkin lymphoma	15	OIP5-AS1	0.0963248
non-Hodgkin lymphoma	16	GHRLOS	0.0696686
non-Hodgkin lymphoma	17	DBET	0.0447409
non-Hodgkin lymphoma	18	DISC1FP1	0.0340244
non-Hodgkin lymphoma	19	PWAR5	0.021073
non-Hodgkin lymphoma	20	LINC00479	0.0104354
non-Hodgkin lymphoma	21	TSIX	0.00622387
non-Hodgkin lymphoma	22	VLDLR-AS1	0.00578494
non-Hodgkin lymphoma	23	LINC00575	0.0057003
non-Hodgkin lymphoma	24	LINC00315	0.00525331
non-Hodgkin lymphoma	25	LINC01235	0.00487712
non-Hodgkin lymphoma	26	PWRN1	0.00487356
non-Hodgkin lymphoma	27	LINC01184	0.00476833
non-Hodgkin lymphoma	28	HELLPAR	0.00447342
non-Hodgkin lymphoma	29	MIR22HG	0.00388935
non-Hodgkin lymphoma	30	CARMN	0.00240488
non-Hodgkin lymphoma	31	B3GALT5-AS1	0.00177724
non-Hodgkin lymphoma	32	FALEC	0.00164707
non-Hodgkin lymphoma	33	XACT	0.00145983
non-Hodgkin lymphoma	34	PARTICL	0.0013811
non-Hodgkin lymphoma	35	MIR4435-2HG	0.00119974
non-Hodgkin lymphoma	36	MIR181A1HG	0.00104862
non-Hodgkin lymphoma	37	PEG3-AS1	0.00104137
non-Hodgkin lymphoma	38	COPG2IT1	0.000856608
non-Hodgkin lymphoma	39	PCAT4	0.000805242
non-Hodgkin lymphoma	40	ADORA2A-AS1	0.000779636
non-Hodgkin lymphoma	41	COL18A1-AS1	0.000778047
non-Hodgkin lymphoma	42	LINC00293	0.000772568
non-Hodgkin lymphoma	43	APTR	0.000725174
non-Hodgkin lymphoma	44	DIO3OS	0.000694019
non-Hodgkin lymphoma	45	OLMALINC	0.000653607
non-Hodgkin lymphoma	46	HAS2-AS1	0.000652829
non-Hodgkin lymphoma	47	RAD51-AS1	0.000616174
non-Hodgkin lymphoma	48	LINC01602	0.000533725
non-Hodgkin lymphoma	49	NUP50-AS1	0.000492007
non-Hodgkin lymphoma	50	FAM30A	0.000459336
benign neoplasm	1	H19	0.999997
benign neoplasm	2	MALAT1	0.999634
benign neoplasm	3	KCNQ1OT1	0.946071
benign neoplasm	4	OIP5-AS1	0.751098
benign neoplasm	5	GATA3-AS1	0.733977
benign neoplasm	6	LINC00477	0.71244
benign neoplasm	7	PARD6G-AS1	0.701101
benign neoplasm	8	LINC00319	0.700786
benign neoplasm	9	CECR7	0.700766
benign neoplasm	10	MEG8	0.700312
benign neoplasm	11	GABPB1-AS1	0.699757
benign neoplasm	12	PWAR5	0.698148
benign neoplasm	13	LINC00479	0.683118
benign neoplasm	14	TSIX	0.681848
benign neoplasm	15	LINC00575	0.520665
benign neoplasm	16	LINC00315	0.510654
benign neoplasm	17	LINC01184	0.447529
benign neoplasm	18	CARMN	0.374726
benign neoplasm	19	GHRLOS	0.34417
benign neoplasm	20	MIR22HG	0.150218
benign neoplasm	21	HELLPAR	0.131358
benign neoplasm	22	LINC01235	0.0844533
benign neoplasm	23	VLDLR-AS1	0.0804379
benign neoplasm	24	DISC1FP1	0.0322751
benign neoplasm	25	PWRN1	0.00899112
benign neoplasm	26	TTTY4	0.00770773
benign neoplasm	27	B3GALT5-AS1	0.00684974
benign neoplasm	28	DBET	0.00575431
benign neoplasm	29	XACT	0.00450012
benign neoplasm	30	PARTICL	0.00348262
benign neoplasm	31	MIR4435-2HG	0.00344039
benign neoplasm	32	MIR181A1HG	0.00218518
benign neoplasm	33	PEG3-AS1	0.00217852
benign neoplasm	34	COPG2IT1	0.00186062
benign neoplasm	35	PCAT4	0.00149088
benign neoplasm	36	ADORA2A-AS1	0.000841127
benign neoplasm	37	COL18A1-AS1	0.000728392
benign neoplasm	38	LINC00293	0.000657465
benign neoplasm	39	APTR	0.000567538
benign neoplasm	40	DIO3OS	0.000522983
benign neoplasm	41	OLMALINC	0.00052015
benign neoplasm	42	HAS2-AS1	0.000488467
benign neoplasm	43	RAD51-AS1	0.000485614
benign neoplasm	44	LINC01602	0.000476112
benign neoplasm	45	NUP50-AS1	0.000454119
benign neoplasm	46	FAM30A	0.000362373
benign neoplasm	47	LINC00273	0.000327638
benign neoplasm	48	LRRC3DN	0.000324955
benign neoplasm	49	GPR1-AS	0.00030256
benign neoplasm	50	FALEC	0.000269568
immune system cancer	1	HOTAIR	0.999982
immune system cancer	2	TP73-AS1	0.99996
immune system cancer	3	NEAT1	0.999414
immune system cancer	4	UCA1	0.998811
immune system cancer	5	HULC	0.997977
immune system cancer	6	CCDC26	0.997758
immune system cancer	7	MIR100HG	0.99737
immune system cancer	8	MIR17HG	0.980265
immune system cancer	9	MALAT1	0.973003
immune system cancer	10	MEG3	0.94642
immune system cancer	11	TUG1	0.82823
immune system cancer	12	MIR155HG	0.74972
immune system cancer	13	TP53COR1	0.747889
immune system cancer	14	MIR99AHG	0.694412
immune system cancer	15	CDKN2B-AS1	0.692262
immune system cancer	16	GAS5	0.691446
immune system cancer	17	PARD6G-AS1	0.667737
immune system cancer	18	GATA3-AS1	0.604295
immune system cancer	19	LINC00477	0.513145
immune system cancer	20	CECR7	0.413113
immune system cancer	21	LINC00319	0.412679
immune system cancer	22	OIP5-AS1	0.33729
immune system cancer	23	MEG8	0.300649
immune system cancer	24	GABPB1-AS1	0.299424
immune system cancer	25	LINC00479	0.275171
immune system cancer	26	CARMN	0.227304
immune system cancer	27	PWAR5	0.196664
immune system cancer	28	B3GALT5-AS1	0.150382
immune system cancer	29	LINC00575	0.134598
immune system cancer	30	LINC00315	0.117699
immune system cancer	31	PWRN1	0.105376
immune system cancer	32	GHRLOS	0.0857147
immune system cancer	33	MIR22HG	0.0695953
immune system cancer	34	HELLPAR	0.0661456
immune system cancer	35	LINC01235	0.0635407
immune system cancer	36	VLDLR-AS1	0.0473497
immune system cancer	37	TSIX	0.0469738
immune system cancer	38	LINC01184	0.0460766
immune system cancer	39	GPR1-AS	0.0391178
immune system cancer	40	FALEC	0.0369059
immune system cancer	41	XACT	0.0295424
immune system cancer	42	PARTICL	0.0263379
immune system cancer	43	MIR4435-2HG	0.0236804
immune system cancer	44	MIR181A1HG	0.0136332
immune system cancer	45	PEG3-AS1	0.013511
immune system cancer	46	COPG2IT1	0.0118968
immune system cancer	47	PCAT4	0.0106169
immune system cancer	48	ADORA2A-AS1	0.00869152
immune system cancer	49	COL18A1-AS1	0.00743984
immune system cancer	50	LINC00293	0.00648736
cell type benign neoplasm	1	MEG3	0.997178
cell type benign neoplasm	2	OIP5-AS1	0.995942
cell type benign neoplasm	3	PARD6G-AS1	0.995661
cell type benign neoplasm	4	GATA3-AS1	0.933702
cell type benign neoplasm	5	LINC00477	0.701128
cell type benign neoplasm	6	LINC00319	0.700019
cell type benign neoplasm	7	CECR7	0.700008
cell type benign neoplasm	8	GABPB1-AS1	0.700006
cell type benign neoplasm	9	VLDLR-AS1	0.700002
cell type benign neoplasm	10	DBET	0.695217
cell type benign neoplasm	11	CARMN	0.693093
cell type benign neoplasm	12	DISC1FP1	0.692744
cell type benign neoplasm	13	PWAR5	0.687404
cell type benign neoplasm	14	LINC00479	0.577769
cell type benign neoplasm	15	TSIX	0.472212
cell type benign neoplasm	16	LINC01235	0.446408
cell type benign neoplasm	17	LINC00575	0.289876
cell type benign neoplasm	18	PWRN1	0.234894
cell type benign neoplasm	19	LINC01184	0.149088
cell type benign neoplasm	20	TTTY4	0.0776696
cell type benign neoplasm	21	GHRLOS	0.0390357
cell type benign neoplasm	22	MIR22HG	0.00954021
cell type benign neoplasm	23	HELLPAR	0.00927596
cell type benign neoplasm	24	LINC00315	0.00723418
cell type benign neoplasm	25	B3GALT5-AS1	0.00647221
cell type benign neoplasm	26	FMR1-AS1	0.00634978
cell type benign neoplasm	27	GPR1-AS	0.00541498
cell type benign neoplasm	28	XACT	0.00519745
cell type benign neoplasm	29	PARTICL	0.0022882
cell type benign neoplasm	30	MIR4435-2HG	0.00211085
cell type benign neoplasm	31	MIR181A1HG	0.00180364
cell type benign neoplasm	32	PEG3-AS1	0.00162973
cell type benign neoplasm	33	COPG2IT1	0.00140804
cell type benign neoplasm	34	PCAT4	0.00132731
cell type benign neoplasm	35	ADORA2A-AS1	0.00123678
cell type benign neoplasm	36	COL18A1-AS1	0.00102553
cell type benign neoplasm	37	FALEC	0.00100442
cell type benign neoplasm	38	LINC00293	0.000999562
cell type benign neoplasm	39	DIO3OS	0.000988108
cell type benign neoplasm	40	OLMALINC	0.000964509
cell type benign neoplasm	41	HAS2-AS1	0.000897009
cell type benign neoplasm	42	RAD51-AS1	0.000885776
cell type benign neoplasm	43	LINC01602	0.00082676
cell type benign neoplasm	44	NUP50-AS1	0.000784002
cell type benign neoplasm	45	FAM30A	0.000748291
cell type benign neoplasm	46	LINC00273	0.000698353
cell type benign neoplasm	47	LRRC3DN	0.000694503
cell type benign neoplasm	48	APTR	0.000642564
cell type benign neoplasm	49	LINC01081	0.00062354
cell type benign neoplasm	50	GNG12-AS1	0.000599963
organ system benign neoplasm	1	H19	0.887451
organ system benign neoplasm	2	MALAT1	0.722502
organ system benign neoplasm	3	MEG3	0.703617
organ system benign neoplasm	4	HOTAIR	0.701406
organ system benign neoplasm	5	OIP5-AS1	0.700474
organ system benign neoplasm	6	GATA3-AS1	0.700015
organ system benign neoplasm	7	LINC00477	0.699993
organ system benign neoplasm	8	PARD6G-AS1	0.699946
organ system benign neoplasm	9	LINC00319	0.699901
organ system benign neoplasm	10	CECR7	0.699743
organ system benign neoplasm	11	MEG8	0.69679
organ system benign neoplasm	12	GABPB1-AS1	0.692521
organ system benign neoplasm	13	CARMN	0.685488
organ system benign neoplasm	14	PWAR5	0.677084
organ system benign neoplasm	15	LINC00479	0.64282
organ system benign neoplasm	16	TSIX	0.555339
organ system benign neoplasm	17	PWRN1	0.380843
organ system benign neoplasm	18	LINC00315	0.372661
organ system benign neoplasm	19	LINC01184	0.344759
organ system benign neoplasm	20	GHRLOS	0.321724
organ system benign neoplasm	21	MIR22HG	0.281154
organ system benign neoplasm	22	HELLPAR	0.0570202
organ system benign neoplasm	23	LINC01235	0.0444527
organ system benign neoplasm	24	VLDLR-AS1	0.0427387
organ system benign neoplasm	25	DISC1FP1	0.0110468
organ system benign neoplasm	26	LINC00575	0.00499364
organ system benign neoplasm	27	TTTY4	0.00461269
organ system benign neoplasm	28	B3GALT5-AS1	0.00323337
organ system benign neoplasm	29	FMR1-AS1	0.00296156
organ system benign neoplasm	30	XACT	0.00278442
organ system benign neoplasm	31	PARTICL	0.00235174
organ system benign neoplasm	32	MIR4435-2HG	0.00205129
organ system benign neoplasm	33	MIR181A1HG	0.00179749
organ system benign neoplasm	34	PEG3-AS1	0.00164224
organ system benign neoplasm	35	COPG2IT1	0.00157858
organ system benign neoplasm	36	PCAT4	0.00153979
organ system benign neoplasm	37	ADORA2A-AS1	0.00149024
organ system benign neoplasm	38	COL18A1-AS1	0.00115996
organ system benign neoplasm	39	LINC00293	0.00111187
organ system benign neoplasm	40	APTR	0.00109433
organ system benign neoplasm	41	DIO3OS	0.00098397
organ system benign neoplasm	42	OLMALINC	0.000978369
organ system benign neoplasm	43	HAS2-AS1	0.000796776
organ system benign neoplasm	44	RAD51-AS1	0.000782084
organ system benign neoplasm	45	LINC01602	0.00074638
organ system benign neoplasm	46	NUP50-AS1	0.000663961
organ system benign neoplasm	47	FAM30A	0.000618628
organ system benign neoplasm	48	LINC00273	0.000580964
organ system benign neoplasm	49	LRRC3DN	0.000507826
organ system benign neoplasm	50	DBET	0.000455408
endocrine organ benign neoplasm	1	MEG3	0.473936
endocrine organ benign neoplasm	2	H19	0.10265
endocrine organ benign neoplasm	3	HOTAIR	0.0719448
endocrine organ benign neoplasm	4	GATA3-AS1	0.034993
endocrine organ benign neoplasm	5	LINC00477	0.0186153
endocrine organ benign neoplasm	6	PARD6G-AS1	0.0167083
endocrine organ benign neoplasm	7	LINC00319	0.0149627
endocrine organ benign neoplasm	8	CECR7	0.0127117
endocrine organ benign neoplasm	9	GABPB1-AS1	0.00649666
endocrine organ benign neoplasm	10	MEG8	0.00212356
endocrine organ benign neoplasm	11	CARMN	0.0020815
endocrine organ benign neoplasm	12	PWAR5	0.000660691
endocrine organ benign neoplasm	13	LINC00479	0.000645087
endocrine organ benign neoplasm	14	TSIX	0.000487508
endocrine organ benign neoplasm	15	LINC00575	0.000475365
endocrine organ benign neoplasm	16	LINC00315	0.000330257
endocrine organ benign neoplasm	17	PWRN1	0.000306433
endocrine organ benign neoplasm	18	LINC01184	0.000292827
endocrine organ benign neoplasm	19	GHRLOS	0.000291794
endocrine organ benign neoplasm	20	MIR22HG	0.000283977
endocrine organ benign neoplasm	21	HELLPAR	0.000230286
endocrine organ benign neoplasm	22	LINC01235	0.000191665
endocrine organ benign neoplasm	23	VLDLR-AS1	0.000175328
endocrine organ benign neoplasm	24	DISC1FP1	0.000122541
endocrine organ benign neoplasm	25	TTTY4	0.000119896
endocrine organ benign neoplasm	26	FALEC	0.000113211
endocrine organ benign neoplasm	27	B3GALT5-AS1	0.000110322
endocrine organ benign neoplasm	28	DBET	0.000110322
endocrine organ benign neoplasm	29	XACT	0.000110322
endocrine organ benign neoplasm	30	PARTICL	0.000110322
endocrine organ benign neoplasm	31	MIR4435-2HG	0.000110322
endocrine organ benign neoplasm	32	MIR181A1HG	0.000110322
endocrine organ benign neoplasm	33	PEG3-AS1	0.00010586
endocrine organ benign neoplasm	34	COPG2IT1	0.000101574
endocrine organ benign neoplasm	35	PCAT4	8.23027e-05
endocrine organ benign neoplasm	36	ADORA2A-AS1	8.01108e-05
endocrine organ benign neoplasm	37	COL18A1-AS1	7.91048e-05
endocrine organ benign neoplasm	38	FMR1-AS1	7.72825e-05
endocrine organ benign neoplasm	39	LINC00293	6.98233e-05
endocrine organ benign neoplasm	40	DIO3OS	6.64331e-05
endocrine organ benign neoplasm	41	OLMALINC	6.27222e-05
endocrine organ benign neoplasm	42	HAS2-AS1	4.85023e-05
endocrine organ benign neoplasm	43	RAD51-AS1	4.28539e-05
endocrine organ benign neoplasm	44	LINC01602	4.20633e-05
endocrine organ benign neoplasm	45	NUP50-AS1	3.87974e-05
endocrine organ benign neoplasm	46	FAM30A	3.84736e-05
endocrine organ benign neoplasm	47	LINC00273	3.54758e-05
endocrine organ benign neoplasm	48	LRRC3DN	3.474e-05
endocrine organ benign neoplasm	49	APTR	3.30295e-05
endocrine organ benign neoplasm	50	GPR1-AS	3.11013e-05
musculoskeletal system cancer	1	MEG3	0.9999
musculoskeletal system cancer	2	TUG1	0.998971
musculoskeletal system cancer	3	UCA1	0.997791
musculoskeletal system cancer	4	HULC	0.99605
musculoskeletal system cancer	5	BANCR	0.984534
musculoskeletal system cancer	6	EWSAT1	0.967124
musculoskeletal system cancer	7	HOTTIP	0.956306
musculoskeletal system cancer	8	PVT1	0.876424
musculoskeletal system cancer	9	RMST	0.737289
musculoskeletal system cancer	10	HCG4	0.704828
musculoskeletal system cancer	11	GAS5	0.665181
musculoskeletal system cancer	12	TUSC7	0.339595
musculoskeletal system cancer	13	MALAT1	0.329233
musculoskeletal system cancer	14	GATA3-AS1	0.328036
musculoskeletal system cancer	15	LINC00477	0.299866
musculoskeletal system cancer	16	PARD6G-AS1	0.299157
musculoskeletal system cancer	17	CECR7	0.26881
musculoskeletal system cancer	18	LINC00319	0.189964
musculoskeletal system cancer	19	MEG8	0.188024
musculoskeletal system cancer	20	GABPB1-AS1	0.160234
musculoskeletal system cancer	21	PWAR5	0.121425
musculoskeletal system cancer	22	CARMN	0.118893
musculoskeletal system cancer	23	LINC00479	0.116023
musculoskeletal system cancer	24	B3GALT5-AS1	0.107166
musculoskeletal system cancer	25	LINC00575	0.0818637
musculoskeletal system cancer	26	LINC00315	0.0796216
musculoskeletal system cancer	27	LINC01184	0.0697538
musculoskeletal system cancer	28	GHRLOS	0.0689983
musculoskeletal system cancer	29	MIR22HG	0.0667819
musculoskeletal system cancer	30	HELLPAR	0.059722
musculoskeletal system cancer	31	LINC01235	0.0540947
musculoskeletal system cancer	32	VLDLR-AS1	0.0453435
musculoskeletal system cancer	33	DISC1FP1	0.0381313
musculoskeletal system cancer	34	TSIX	0.0362367
musculoskeletal system cancer	35	PWRN1	0.027403
musculoskeletal system cancer	36	FAM30A	0.0228923
musculoskeletal system cancer	37	FALEC	0.0197089
musculoskeletal system cancer	38	XACT	0.0157512
musculoskeletal system cancer	39	PARTICL	0.0127206
musculoskeletal system cancer	40	MIR4435-2HG	0.012477
musculoskeletal system cancer	41	MIR181A1HG	0.0113895
musculoskeletal system cancer	42	PEG3-AS1	0.0111212
musculoskeletal system cancer	43	COPG2IT1	0.0109506
musculoskeletal system cancer	44	PCAT4	0.00983003
musculoskeletal system cancer	45	ADORA2A-AS1	0.0082107
musculoskeletal system cancer	46	COL18A1-AS1	0.0078474
musculoskeletal system cancer	47	LINC00293	0.00756801
musculoskeletal system cancer	48	APTR	0.00740266
musculoskeletal system cancer	49	DIO3OS	0.00736816
[truncated: 18,251 more rows]
